# Supplementary material for: Non-covalent interactions in molecular architectures and solvent-free catalytic activity towards CO2 fixation of mononuclear Co(iii) complexes installed on modified Schiff base ligands
Source: Royal Society of Chemistry journal article supplement (doi:10.1039/d3dt04293f), 2024-01-01
Supplement: d3dt04293f1.pdf [file d3dt04293f1.pdf]

Supporting Information

For

**Non-covalent Interactions in Molecular Architecture and Solvent Free Catalytic Activity Towards CO<sub>2</sub> Fixation of Mononuclear Co(III) Complexes Installed on Modified Schiff Base Ligands**

Souvik Barman<sup>a</sup>, Dhiraj Das<sup>a,b</sup> and Kuntal Pal<sup>\*a</sup>

Department of Chemistry, University of Calcutta, 92 APC Road, Kolkata 700009, India

---

**Contents**

|                                                                                                                          |    |
|--------------------------------------------------------------------------------------------------------------------------|----|
| Fig. S1: <sup>1</sup> H NMR Spectrum of H <sub>2</sub> L <sup>H</sup> in DMSO- <i>d</i> <sub>6</sub> .....               | 4  |
| Fig. S2: <sup>13</sup> C NMR Spectrum of H <sub>2</sub> L <sup>H</sup> in DMSO- <i>d</i> <sub>6</sub> .....              | 5  |
| Fig. S3: <sup>1</sup> H NMR Spectrum of H <sub>2</sub> L <sup>Br</sup> in DMSO- <i>d</i> <sub>6</sub> .....              | 5  |
| Fig. S4: <sup>13</sup> C NMR Spectrum of H <sub>2</sub> L <sup>Br</sup> in DMSO- <i>d</i> <sub>6</sub> .....             | 6  |
| Fig. S5: <sup>1</sup> H NMR Spectrum of H <sub>2</sub> L <sup>NO<sub>2</sub></sup> in DMSO- <i>d</i> <sub>6</sub> .....  | 6  |
| Fig. S6: <sup>13</sup> C NMR Spectrum of H <sub>2</sub> L <sup>NO<sub>2</sub></sup> in DMSO- <i>d</i> <sub>6</sub> ..... | 7  |
| Fig. S7: <sup>1</sup> H NMR Spectrum of Co-1 <sup>H</sup> in CDCl <sub>3</sub> .....                                     | 7  |
| Fig. S7a: <sup>1</sup> H NMR Spectrum of Co-1 <sup>H</sup> in DMSO- <i>d</i> <sub>6</sub> .....                          | 8  |
| Fig. S8: <sup>13</sup> C NMR Spectrum of Co-1 <sup>H</sup> in CDCl <sub>3</sub> .....                                    | 8  |
| Fig. S9: <sup>1</sup> H NMR Spectrum of Co-1 <sup>Br</sup> in CDCl <sub>3</sub> .....                                    | 9  |
| Fig. S9a: <sup>1</sup> H NMR Spectrum of Co-1 <sup>Br</sup> in DMSO- <i>d</i> <sub>6</sub> .....                         | 9  |
| Fig. S10: <sup>13</sup> C NMR Spectrum of Co-1 <sup>Br</sup> in CDCl <sub>3</sub> .....                                  | 10 |
| Fig. S11: <sup>1</sup> H NMR Spectrum of Co-1 <sup>NO<sub>2</sub></sup> in CDCl <sub>3</sub> .....                       | 10 |
| Fig. S11a: <sup>1</sup> H NMR Spectrum of Co-1 <sup>NO<sub>2</sub></sup> in DMSO- <i>d</i> <sub>6</sub> .....            | 11 |
| Fig. S12: <sup>13</sup> C NMR Spectrum of Co-1 <sup>NO<sub>2</sub></sup> in CDCl <sub>3</sub> .....                      | 11 |
| Fig. S13: ESI-MS spectrum of H <sub>2</sub> L <sup>H</sup> .....                                                         | 12 |
| Fig. S14: ESI-MS spectrum of H <sub>2</sub> L <sup>Br</sup> .....                                                        | 12 |
| Fig. S15: ESI-MS spectrum of H <sub>2</sub> L <sup>NO<sub>2</sub></sup> .....                                            | 13 |
| Fig. S16: ESI-MS spectrum of Co-1 <sup>H</sup> .....                                                                     | 13 |
| Fig. S17: ESI-MS spectrum of Co-1 <sup>Br</sup> .....                                                                    | 14 |
| Fig. S18: ESI-MS spectrum of Co-1 <sup>NO<sub>2</sub></sup> .....                                                        | 14 |
| Fig. S19: FTIR spectrum of H <sub>2</sub> L <sup>H</sup> .....                                                           | 15 |
| Fig. S20: FTIR spectrum of H <sub>2</sub> L <sup>Br</sup> .....                                                          | 15 |

|                                                                                                                                                                                                                                                                                                                                                                                                |    |
|------------------------------------------------------------------------------------------------------------------------------------------------------------------------------------------------------------------------------------------------------------------------------------------------------------------------------------------------------------------------------------------------|----|
| Fig. S21: FTIR spectrum of $H_2L^{NO_2}$ .....                                                                                                                                                                                                                                                                                                                                                 | 16 |
| Fig. S22: FTIR spectrum of $Co-1^H$ .....                                                                                                                                                                                                                                                                                                                                                      | 16 |
| Fig. S23: FTIR spectrum of $Co-1^{Br}$ .....                                                                                                                                                                                                                                                                                                                                                   | 17 |
| Fig. S24: FTIR spectrum of $Co-1^{NO_2}$ .....                                                                                                                                                                                                                                                                                                                                                 | 17 |
| Fig. S25: Electronic absorption spectra of $H_2L^H$ ( $0.5 \times 10^{-4}(M)$ in DMF). .....                                                                                                                                                                                                                                                                                                   | 18 |
| Fig. S26: Electronic absorption spectra of $H_2L^{Br}$ ( $1 \times 10^{-5}(M)$ ) in DMF). .....                                                                                                                                                                                                                                                                                                | 18 |
| Fig. S27: Electronic absorption spectra of $H_2L^{NO_2}$ ( $0.5 \times 10^{-4}(M)$ in $CH_3CN$ ). .....                                                                                                                                                                                                                                                                                        | 19 |
| Fig. S28: Electronic absorption spectra of $Co-1^H$ ( $0.5 \times 10^{-4}(M)$ in $CH_3CN$ ). .....                                                                                                                                                                                                                                                                                             | 19 |
| Fig. S29: Electronic absorption spectra of $Co-1^{Br}$ ( $0.5 \times 10^{-4}(M)$ in $CH_3CN$ ). .....                                                                                                                                                                                                                                                                                          | 20 |
| Fig. S30: Electronic absorption spectra of $Co-1^{NO_2}$ ( $0.5 \times 10^{-4}(M)$ in $CH_3CN$ ). .....                                                                                                                                                                                                                                                                                        | 20 |
| Hirshfeld Surface Analysis:.....                                                                                                                                                                                                                                                                                                                                                               | 21 |
| Fig. S31: The $d_{norm}$ of 3D Hirshfeld surfaces of the complex $Co-1^H$ (left), $Co-1^{Br}$ (middle)and $Co-1^{NO_2}$ (right).....                                                                                                                                                                                                                                                           | 21 |
| Fig. S32: The shape index of 3D Hirshfeld surfaces of the complex $Co-1^H$ (left), $Co-1^{Br}$ (middle)and $Co-1^{NO_2}$ (right).....                                                                                                                                                                                                                                                          | 21 |
| Fig. S33:Two views of three dimensional HS plotted over electrostatic potential for $Co-1^{Br}$ . .....                                                                                                                                                                                                                                                                                        | 22 |
| Fig. S34:Two views of three dimensional HS plotted over electrostatic potential for $Co-1^{NO_2}$ . .....                                                                                                                                                                                                                                                                                      | 22 |
| Fig. S35: Three dimensional HS plotted shape index along with representative interacting molecules in surface for $Co-1^{Br}$ . .....                                                                                                                                                                                                                                                          | 23 |
| Fig. S36: Three dimensional HS plotted shape index along with representative interacting molecules in surface for $Co-1^{NO_2}$ . .....                                                                                                                                                                                                                                                        | 23 |
| Fig. S37:Three dimensional HS plotted over $d_{norm}$ along with representative interacting molecules in surface for $Co-1^{Br}$ . .....                                                                                                                                                                                                                                                       | 24 |
| Fig. S38:Three dimensional HS plotted over $d_{norm}$ along with representative interacting molecules in surface for $Co-1^{NO_2}$ . .....                                                                                                                                                                                                                                                     | 24 |
| Fig. S39:2D Fingerprint plots as obtained from the crystal structures for different type of interactions (a) Overall, (b)H..H, (c) H..N, (d) H..C, (e) H..Br, (f) H..O and (g) C..C present in the complex, $Co-1^{Br}$ . The term ‘ $d_i$ ’ stands for distance from the HS to the nearest atom inside the HS, whereas $d_e$ stands for the same from to the nearest atom outside the HS..... | 25 |
| Fig. S40:2D Fingerprint plots as obtained from the crystal structures for different type of interactions (a) Overall, (b)H..H, (c) H..N, (d) H..C, (e) H..O, and (f) C..C present in the complex, $Co-1^{NO_2}$ . The term ‘ $d_i$ ’ stands for distance from the HS to the nearest atom inside the HS, whereas $d_e$ stands for the same from to the nearest atom outside the HS.....         | 26 |
| Fig. S41:Left: Percentage contributions of the interaction of all the atoms present inside the HS to an atom outside the HS. Right: Percentage contributions of the interaction of an atom present inside the HS to all the atoms present in the surrounding of the HS for complex $Co-1^{Br}$ . .....                                                                                         | 26 |

|                                                                                                                                                                                                                                                                                                                                                  |    |
|--------------------------------------------------------------------------------------------------------------------------------------------------------------------------------------------------------------------------------------------------------------------------------------------------------------------------------------------------|----|
| Fig. S42:Left: Percentage contributions of the interaction of all the atoms present inside the HS to an atom outside the HS. Right: Percentage contributions of the interaction of an atom present inside the HS to all the atoms present in the surrounding of the HS for complex Co-1 <sup>NO2</sup> .....                                     | 26 |
| Fig. S43. Interaction energies for the complex Co-1 <sup>H</sup> .....                                                                                                                                                                                                                                                                           | 27 |
| Fig. S44. Interaction energies for the complex Co-1 <sup>Br</sup> .....                                                                                                                                                                                                                                                                          | 27 |
| Fig. S45. Interaction energies for the complex Co-1 <sup>NO2</sup> .....                                                                                                                                                                                                                                                                         | 28 |
| Fig. S46:Energy framework diagramfor Co-1 <sup>Br</sup> (Left: Coulomb Energy, Middle: Dispersion Energy, Right: Total Energy) for Co-1 <sup>Br</sup> . Scale factor of 50 kJ mol <sup>-1</sup> with a cut-off value of 5 kJ mol <sup>-1</sup> .....                                                                                             | 28 |
| Fig. S47:Energy framework diagramfor Co-1 <sup>NO2</sup> (Left: Coulomb Energy, Middle: Dispersion Energy, Right: Total Energy) for Co-1 <sup>NO2</sup> . Scale factor of 50 kJ mol <sup>-1</sup> with a cut-off value of 5 kJ mol <sup>-1</sup> .....                                                                                           | 29 |
| Catalytic Study: .....                                                                                                                                                                                                                                                                                                                           | 29 |
| Fig. S48: <sup>1</sup> H NMR Spectrum in CDCl <sub>3</sub> obtained for a reaction mixture taken after 22 hrs (Co-1 <sup>H</sup> : 1.5 mol%, TBAB: 5 mol%) showing three peaks of styrene carbonate (>99% conversion) [* indicates Tetrabutyl ammonium bromide (TBAB) peaks].....                                                                | 29 |
| Fig. S49: <sup>1</sup> H NMR Spectrum in CDCl <sub>3</sub> obtained for a reaction mixture taken after 22 hrs (Co-1 <sup>Br</sup> : 1.5 mol%, TBAB: 5 mol%) showing three peaks of styrene carbonate (>99% conversion) [* indicates Tetrabutyl ammonium bromide (TBAB) peaks].....                                                               | 30 |
| Fig. S50: <sup>1</sup> H NMR Spectrum in CDCl <sub>3</sub> obtained for a reaction mixture taken after 22 hrs (Co-1 <sup>NO2</sup> : 1.5 mol%, TBAB: 5 mol%) showing three peaks of styrene carbonate (>99% conversion) [* indicates Tetrabutyl ammonium bromide (TBAB) peaks].....                                                              | 30 |
| Fig. S51: <sup>1</sup> H NMR Spectrum in CDCl <sub>3</sub> obtained for a reaction mixture taken after 8 hrs (Co-1 <sup>H</sup> : 1.5 mol%, TBAB: 5 mol%) showing three peaks of styrene carbonate and three peaks associated to styrene oxide starting material (41% conversion) [* indicates Tetrabutyl ammonium bromide (TBAB) peaks]. .....  | 31 |
| Fig. S52: <sup>1</sup> H NMR Spectrum in CDCl <sub>3</sub> obtained for a reaction mixture taken after 8 hrs (Co-1 <sup>Br</sup> : 1.5 mol%, TBAB: 5 mol%) showing three peaks of styrene carbonate and three peaks associated to styrene oxide starting material (45% conversion) [* indicates Tetrabutyl ammonium bromide (TBAB) peaks]. ..... | 31 |
| Fig. S53: <sup>1</sup> H NMR Spectrum in CDCl <sub>3</sub> obtained for a reaction mixture taken after 8 hrs (Co-1 <sup>NO2</sup> : 1.5 mol%, TBAB: 5 mol%) showing three peaks of styrene carbonate and three peaks associated to styrene oxide starting material (48% conversion) [* indicates Tetrabutyl ammonium bromide (TBAB) peaks]. ..   | 32 |
| Fig. S54: <sup>1</sup> H NMR Spectrum in CDCl <sub>3</sub> obtained for a reaction mixture taken after 22 hrs (Co-1 <sup>H</sup> : 1.5 mol%, TBAB: 5 mol%) showing peaks of cyclohexane carbonate (13% conversion) at room temperature. [# indicates Tetrabutyl ammonium bromide (TBAB) peaks]. .....                                            | 32 |
| Fig. S55: <sup>1</sup> H NMR Spectrum in CDCl <sub>3</sub> obtained for a reaction mixture taken after 22 hrs (Co-1 <sup>Br</sup> : 1.5 mol%, TBAB: 5 mol%) showing peaks of cyclohexane carbonate (15% conversion) at room temperature. [# indicates Tetrabutyl ammonium bromide (TBAB) peaks]. .....                                           | 33 |
| Fig. S56: <sup>1</sup> H NMR Spectrum in CDCl <sub>3</sub> obtained for a reaction mixture taken after 22 hrs (Co-1 <sup>NO2</sup> : 1.5 mol%, TBAB: 5 mol%) showing peaks of cyclohexane carbonate (18% conversion) at room temperature. [# indicates Tetrabutyl ammonium bromide (TBAB) peaks]. .....                                          | 33 |

Fig. S57:<sup>1</sup>H NMR Spectrum in CDCl<sub>3</sub> obtained for a reaction mixture taken after 22 hrs (Co-1<sup>H</sup>: 1.5 mol%, TBAB: 5 mol%) showing peaks of cyclohexane carbonate (>99 % conversion) at 70<sup>o</sup>c. [# indicates Tetrabutyl ammonium bromide (TBAB) peaks].....34

Fig. S58:<sup>1</sup>H NMR Spectrum in CDCl<sub>3</sub> obtained for a reaction mixture taken after 22 hrs (Co-1<sup>Br</sup>: 1.5 mol%, TBAB: 5 mol%) showing peaks of cyclohexane carbonate (>99 % conversion) at 70<sup>o</sup>c. [# indicates Tetrabutyl ammonium bromide (TBAB) peaks].....34

Fig. S59:<sup>1</sup>H NMR Spectrum in CDCl<sub>3</sub> obtained for a reaction mixture taken after 22 hrs (Co-1<sup>NO2</sup>: 1.5 mol%, TBAB: 5 mol%) showing peaks of cyclohexane carbonate (>99 % conversion) at 70<sup>o</sup>c. [# indicates Tetrabutyl ammonium bromide (TBAB) peaks].....35

Fig. S60: Carbonyl region of <sup>13</sup>C NMR spectrum of cyclohexane carbonate synthesized using Co-1<sup>H</sup>. ....35

Fig. S61: FT-IR spectrum of cyclic cyclohexane carbonate (*cis*) synthesized using Co-1<sup>H</sup> .....36

Fig. S62: Comparison between the <sup>1</sup>H NMR spectra of complex Co-1<sup>H</sup> (bottom), Co-1<sup>H</sup> in the presence of 4 equiv. TBAB (Middle) and Co-1<sup>H</sup> in the presence of 4 equiv. TBAB and 10 eq. SO (Top) in CDCl<sub>3</sub> (δ<sub>H</sub> 7.26 ppm).....36

Table S1: Crystallographic data parameters. ....37

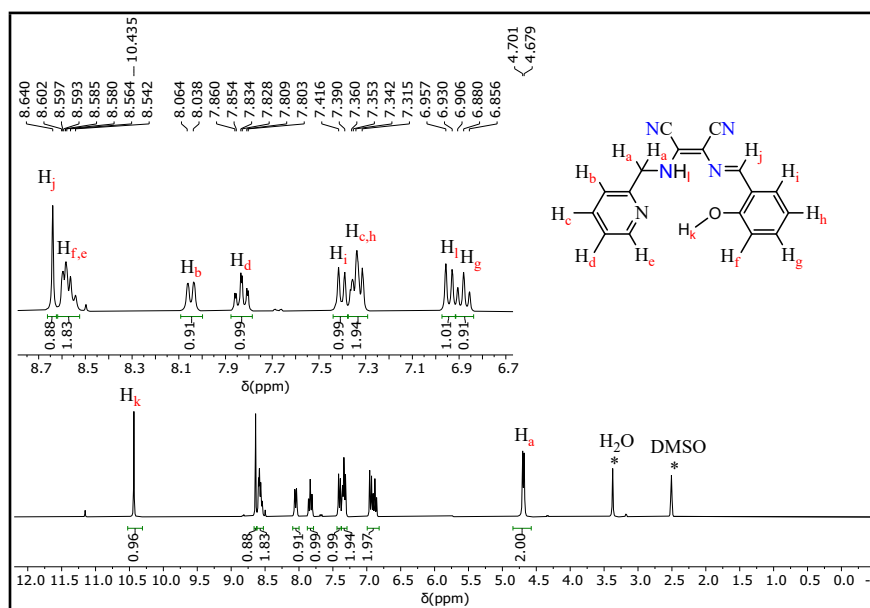

**Fig. S1:** <sup>1</sup>H NMR Spectrum of H<sub>2</sub>L<sup>H</sup> in DMSO-*d*<sub>6</sub>.

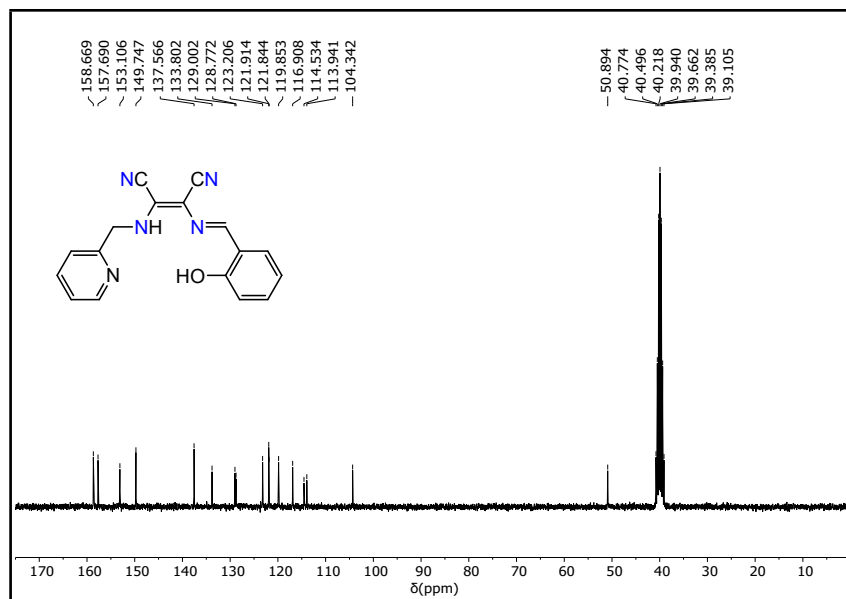

Fig. S2:  $^{13}C$  NMR Spectrum of  $H_2L^H$  in  $DMSO-d_6$ .

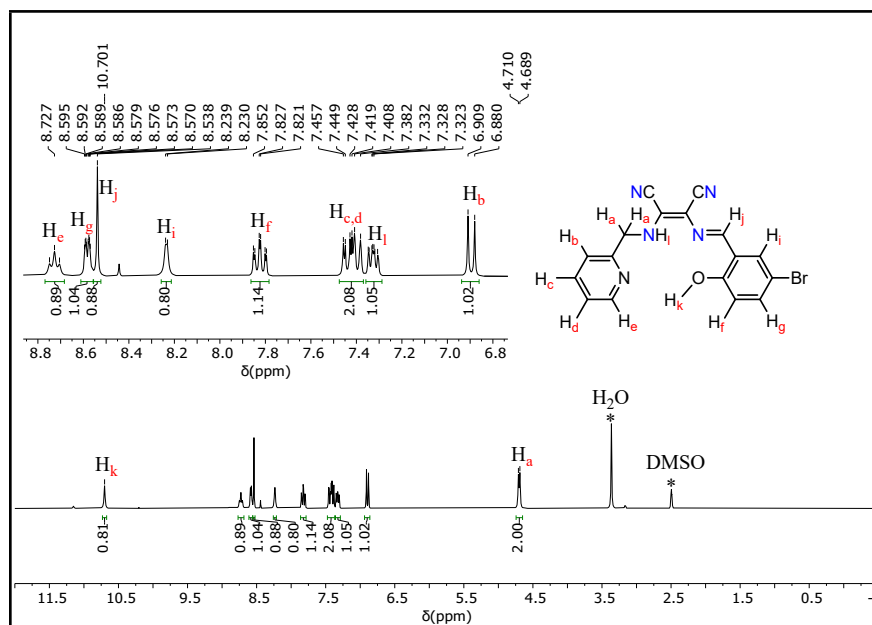

Fig. S3:  $^1H$  NMR Spectrum of  $H_2L^{Br}$  in  $DMSO-d_6$ .

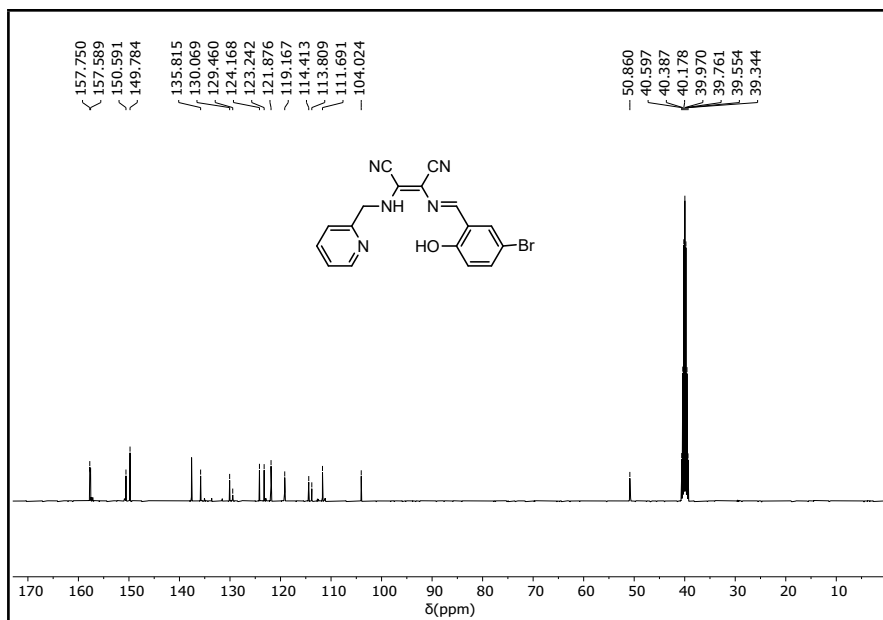

Fig. S4:  $^{13}C$  NMR Spectrum of  $H_2LBr$  in  $DMSO-d_6$ .

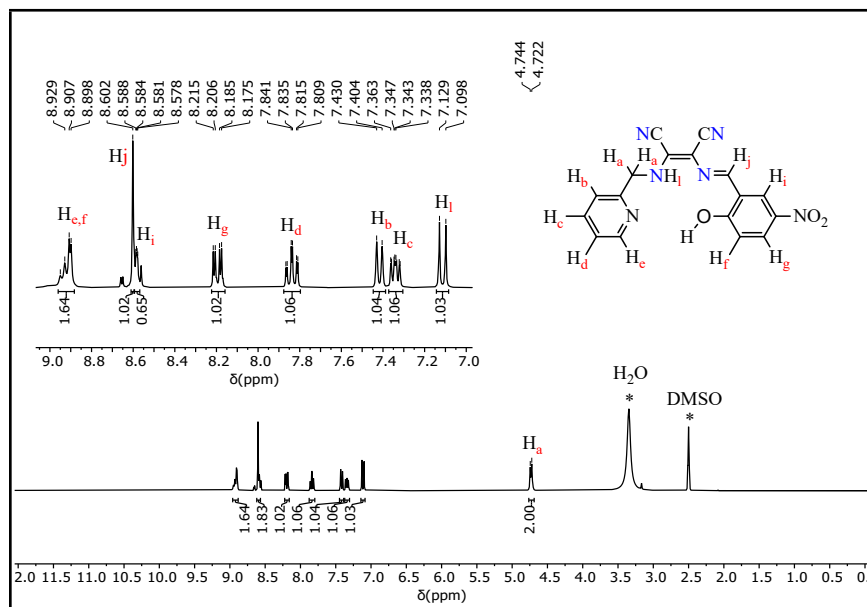

Fig. S5:  $^1H$  NMR Spectrum of  $H_2L^{NO_2}$  in  $DMSO-d_6$ .

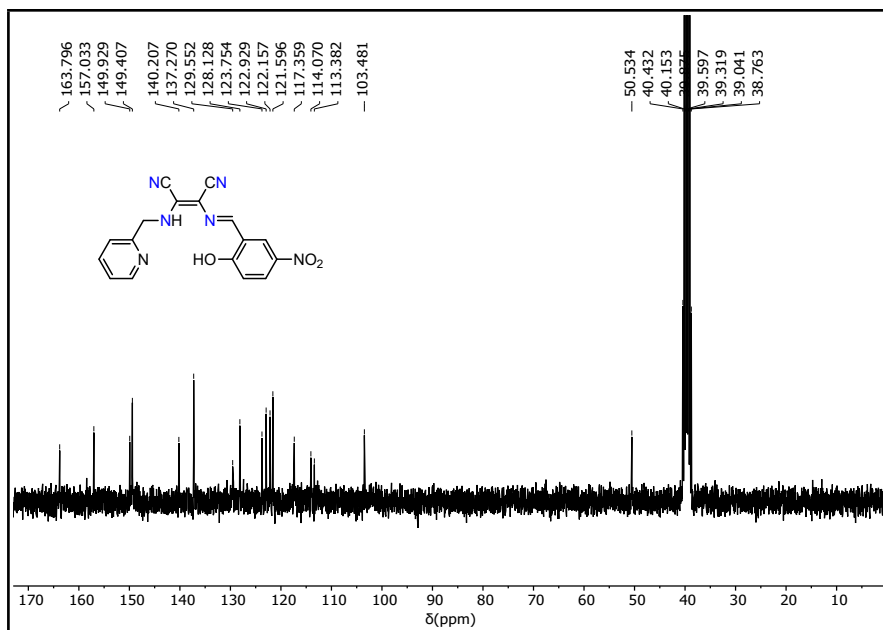

Fig. S6:  $^{13}C$  NMR Spectrum of  $H_2L^{NO_2}$  in  $DMSO-d_6$ .

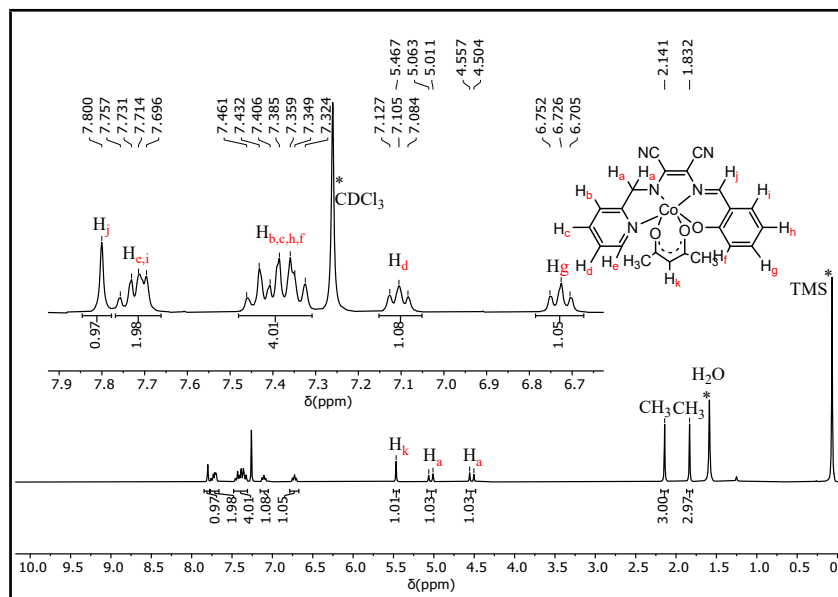

Fig. S7:  $^1H$  NMR Spectrum of  $Co-1^H$  in  $CDCl_3$ .

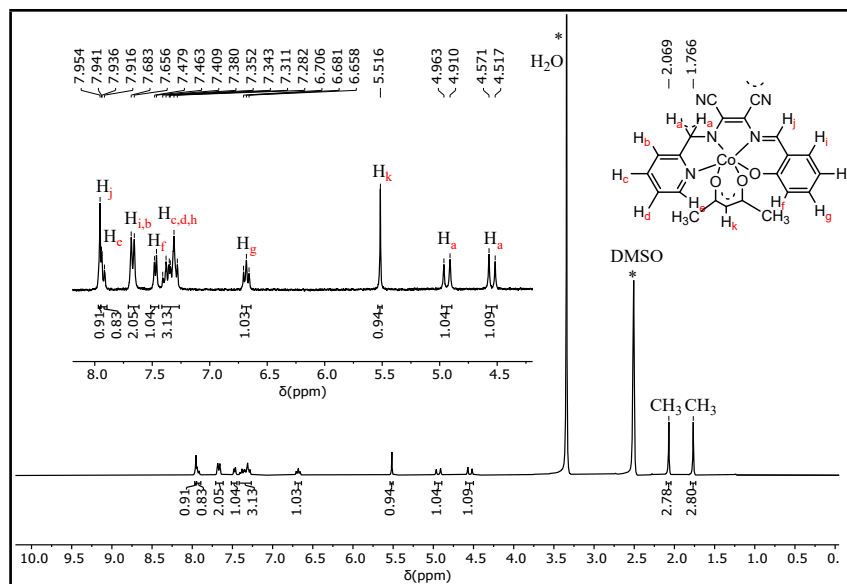

**Fig. S7a:** <sup>1</sup>H NMR Spectrum of Co-1H in DMSO-*d*<sub>6</sub>.

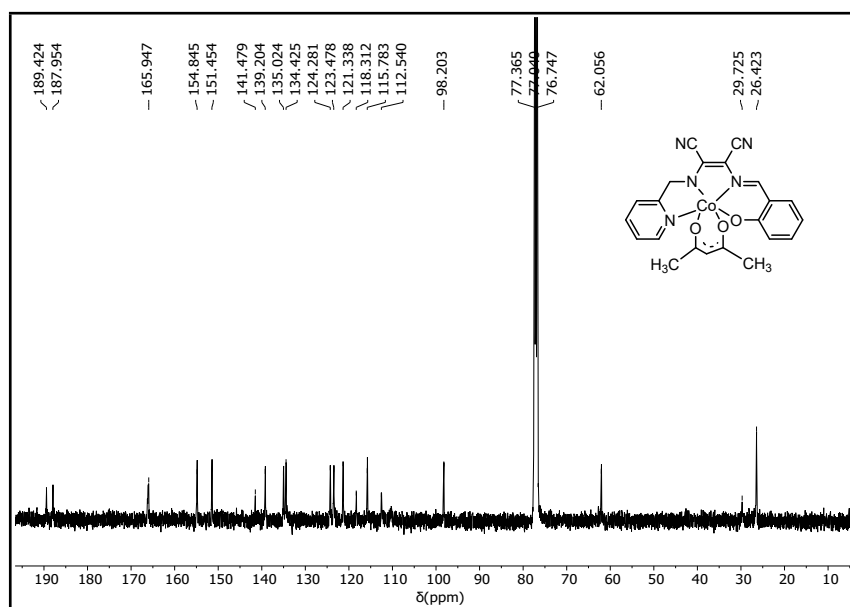

**Fig. S8:** <sup>13</sup>C NMR Spectrum of Co-1H in CDCl<sub>3</sub>.



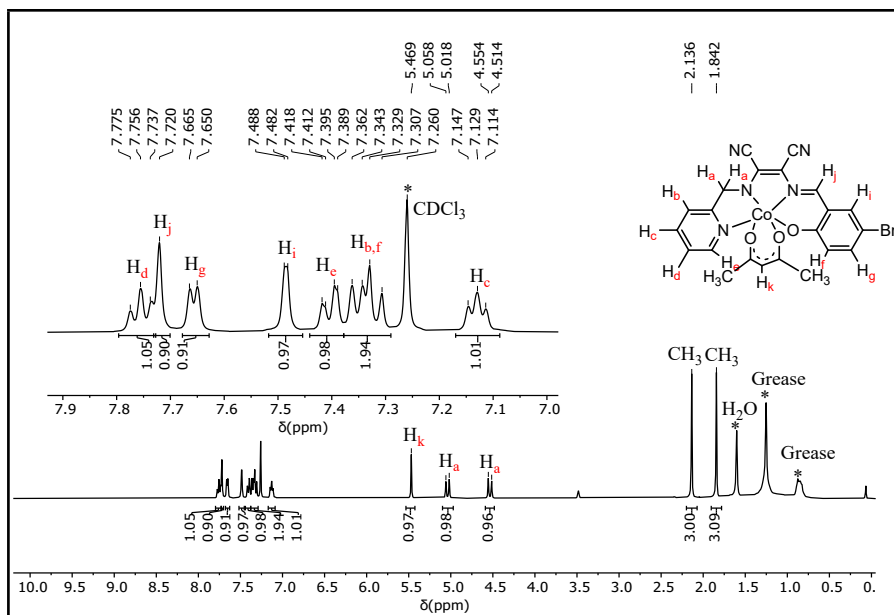

**Fig. S9:**  $^1\text{H}$  NMR Spectrum of Co-1<sup>Br</sup> in  $\text{CDCl}_3$ .

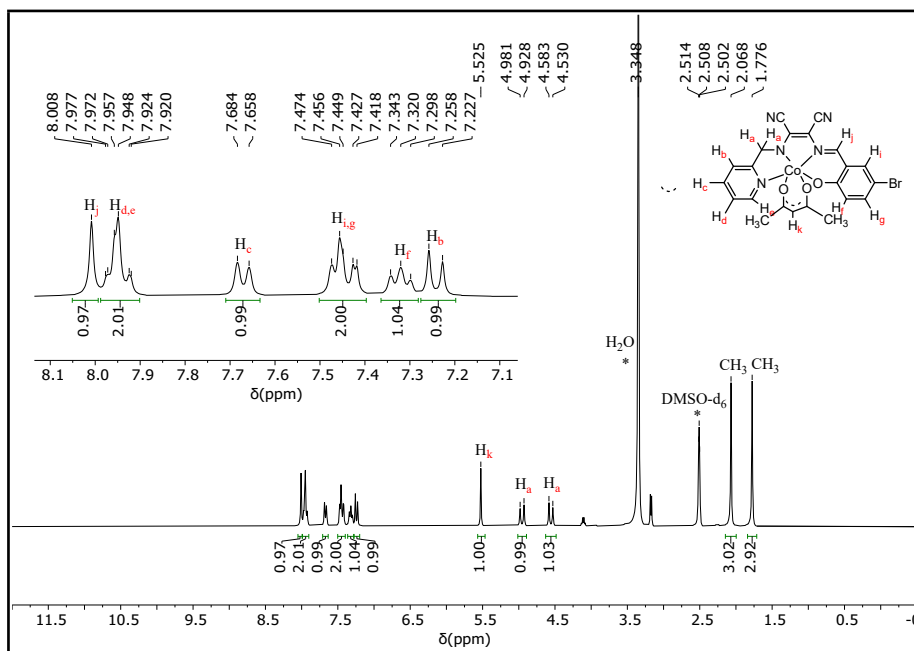

**Fig. S9a:**  $^1\text{H}$  NMR Spectrum of Co-1<sup>Br</sup> in  $\text{DMSO-}d_6$ .

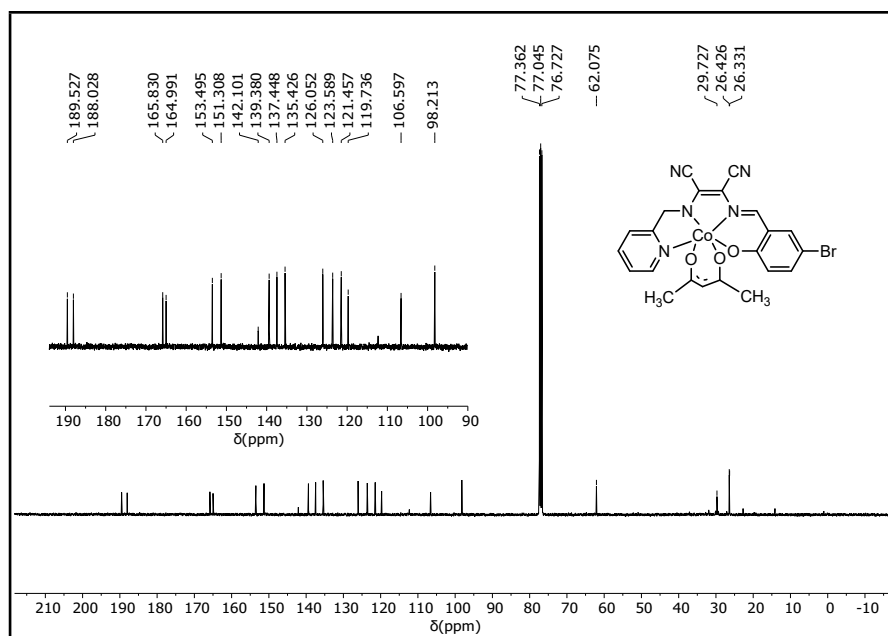

**Fig. S10:**  $^{13}\text{C}$  NMR Spectrum of **Co-1**<sup>Br</sup> in  $\text{CDCl}_3$ .

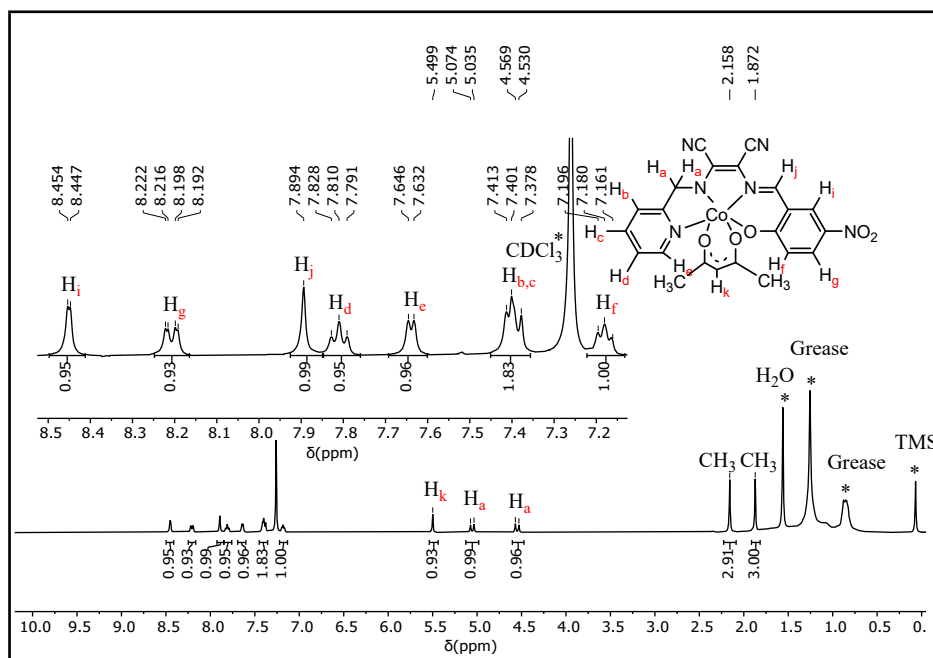

**Fig. S11:**  $^1\text{H}$  NMR Spectrum of **Co-1**<sup>NO<sub>2</sub></sup> in  $\text{CDCl}_3$ .

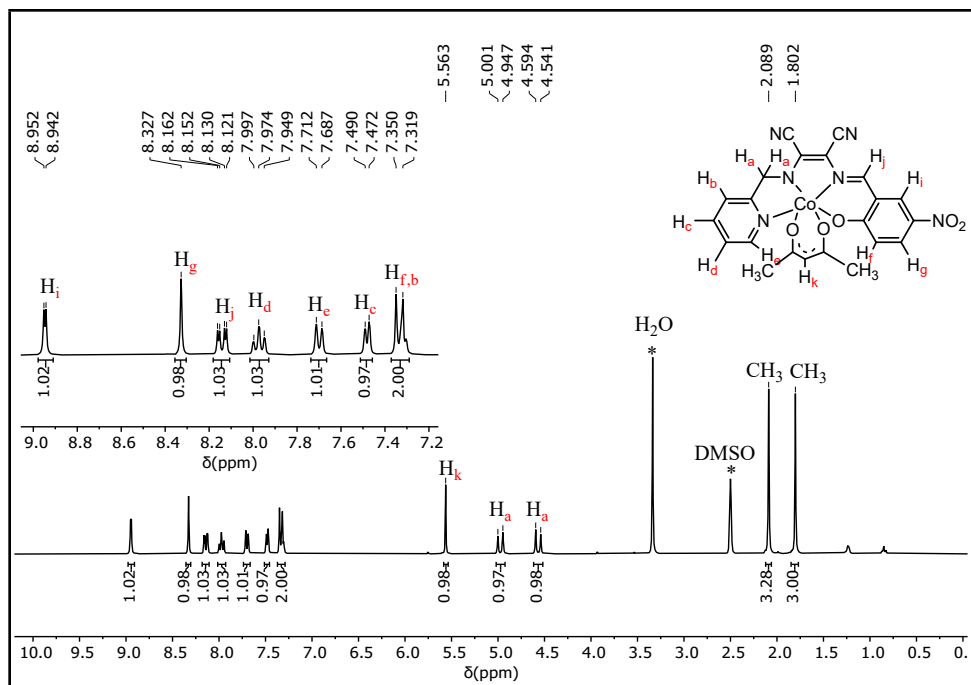

**Fig. S11a:**  $^1\text{H}$  NMR Spectrum of **Co-1<sup>NO2</sup>** in DMSO- $d_6$ .

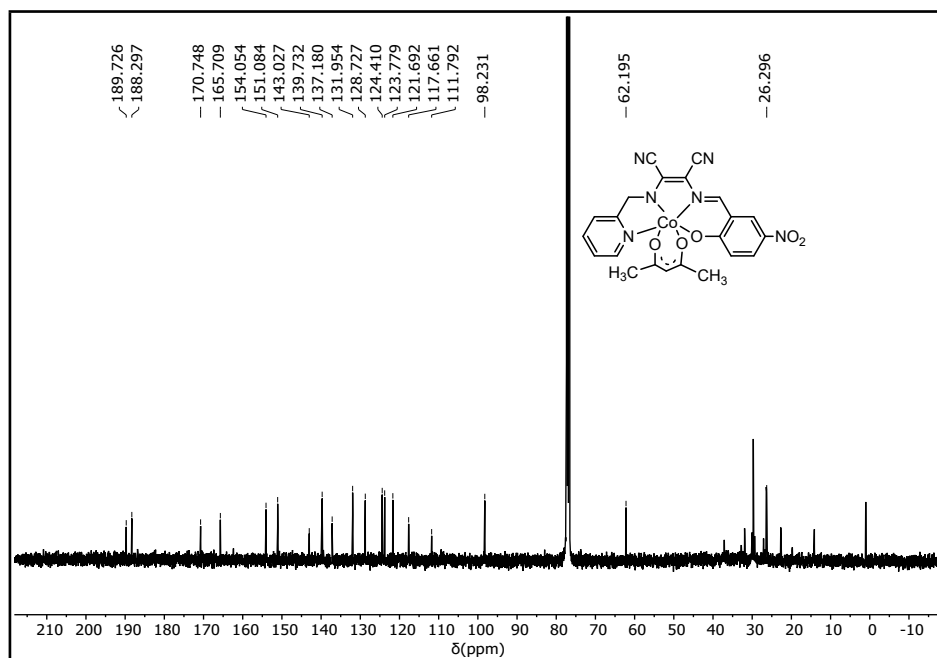

**Fig. S12:**  $^{13}\text{C}$  NMR Spectrum of **Co-1<sup>NO2</sup>** in CDCl $_3$ .

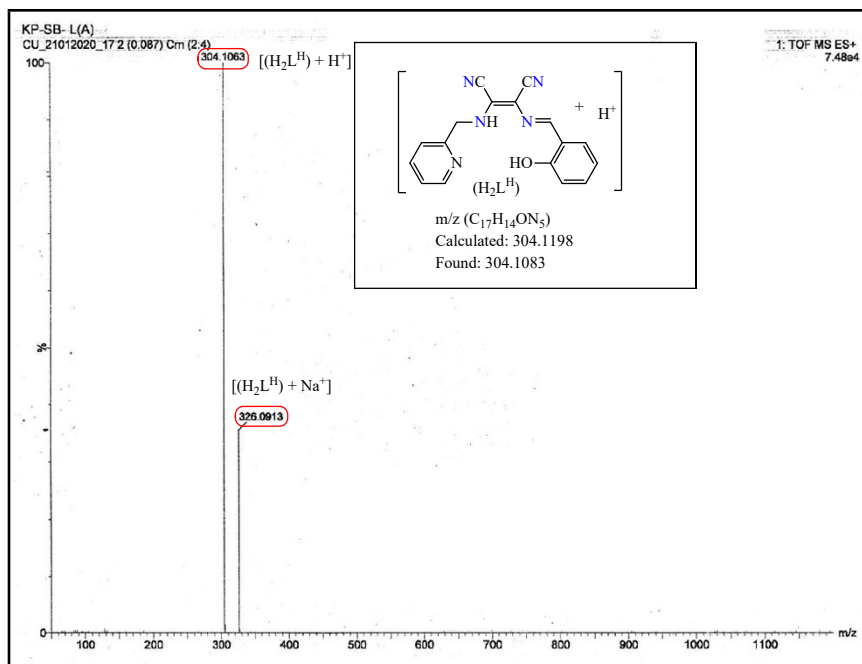

Fig. S13: ESI-MS spectrum of  $H_2L^H$ .

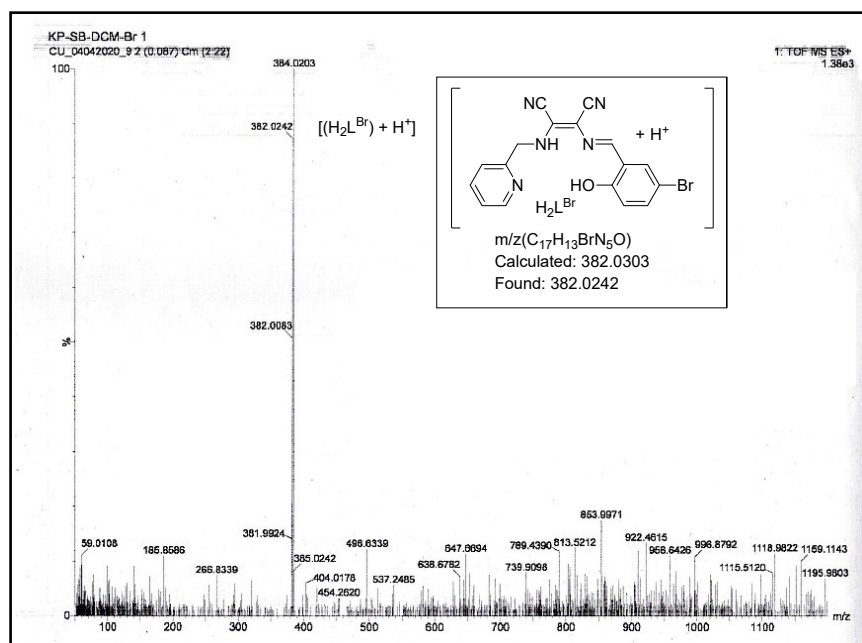

Fig. S14: ESI-MS spectrum of  $H_2L^{Br}$ .

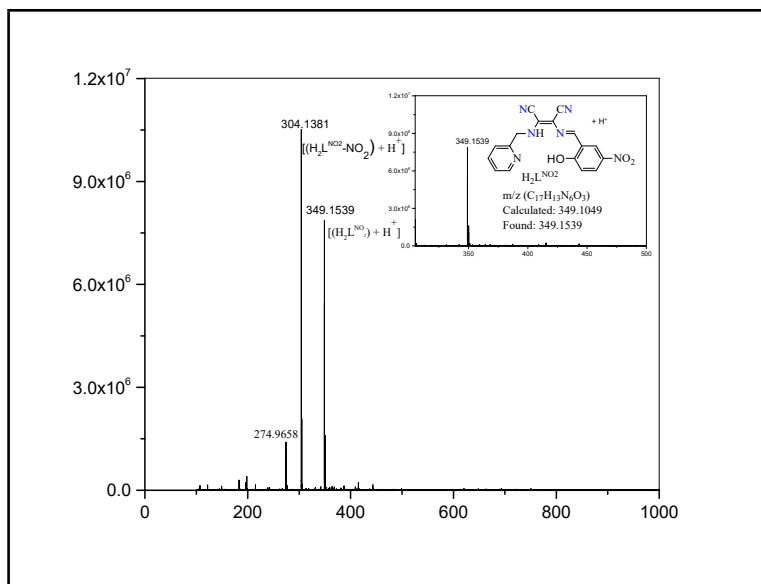

**Fig. S15:** ESI-MS spectrum of  $H_2L^{NO_2}$ .

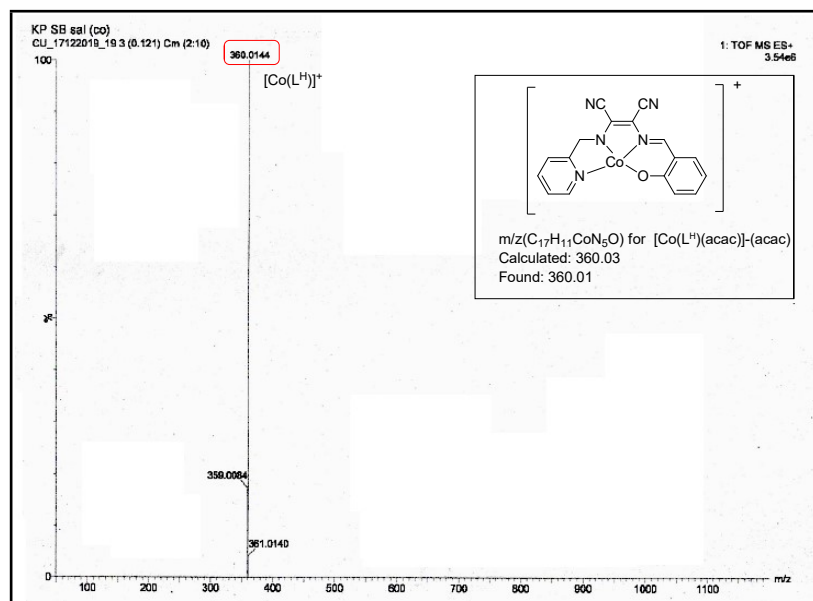

**Fig.S16:** ESI-MS spectrum of  $Co-1^H$ .

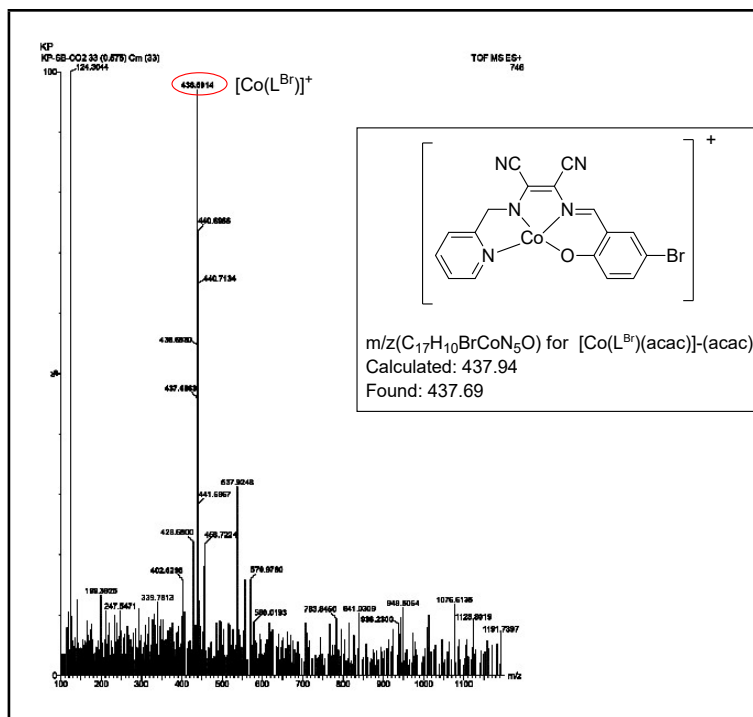

Fig. S17: ESI-MS spectrum of Co-1<sup>Br</sup>.

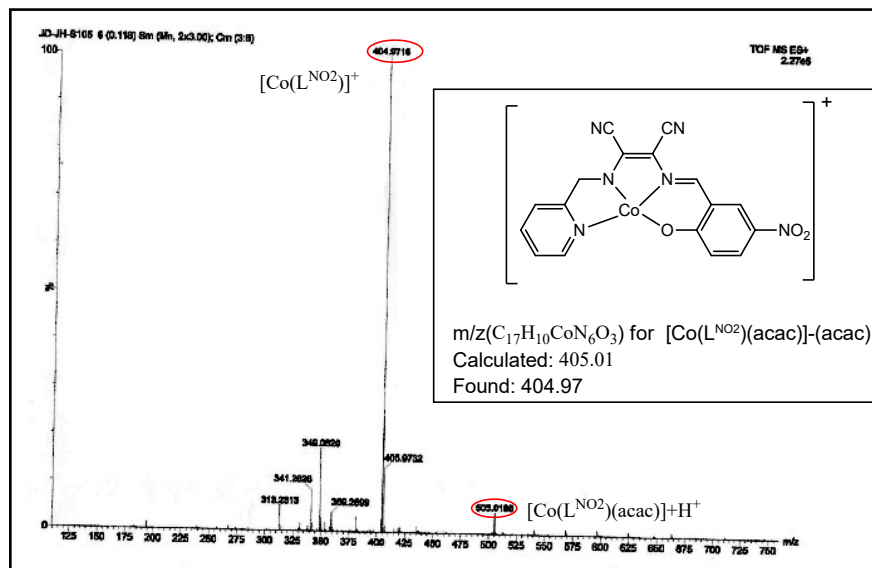

Fig. S18: ESI-MS spectrum of Co-1<sup>NO2</sup>.

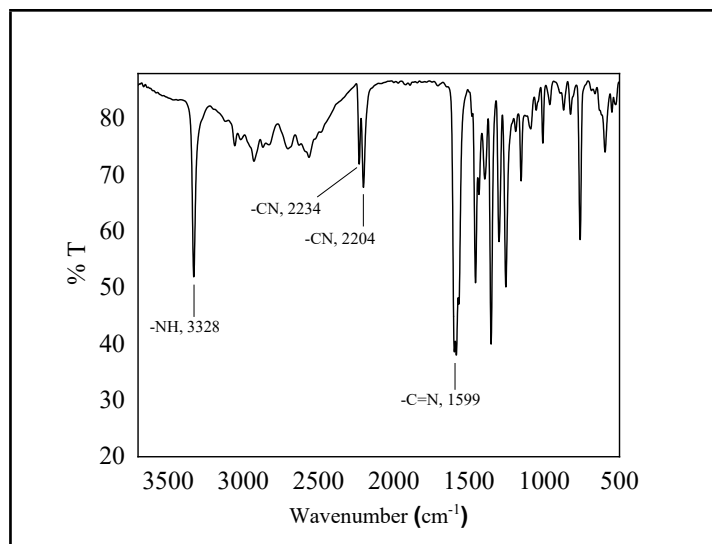

**Fig. S19:** FTIR spectrum of H<sub>2</sub>L<sup>H</sup>.

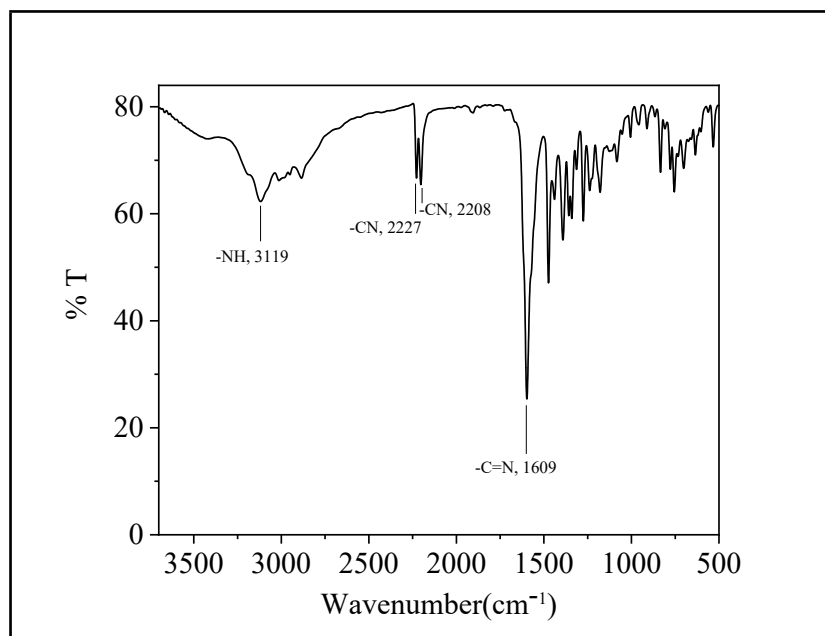

**Fig. S20:** FTIR spectrum of H<sub>2</sub>L<sup>Br</sup>.

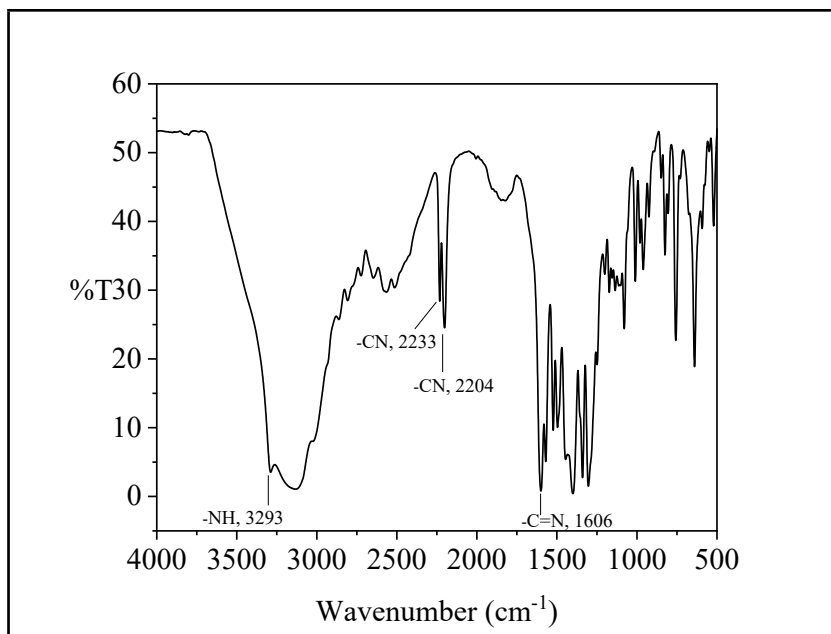

**Fig. S21:** FTIR spectrum of  $H_2L^{NO_2}$ .

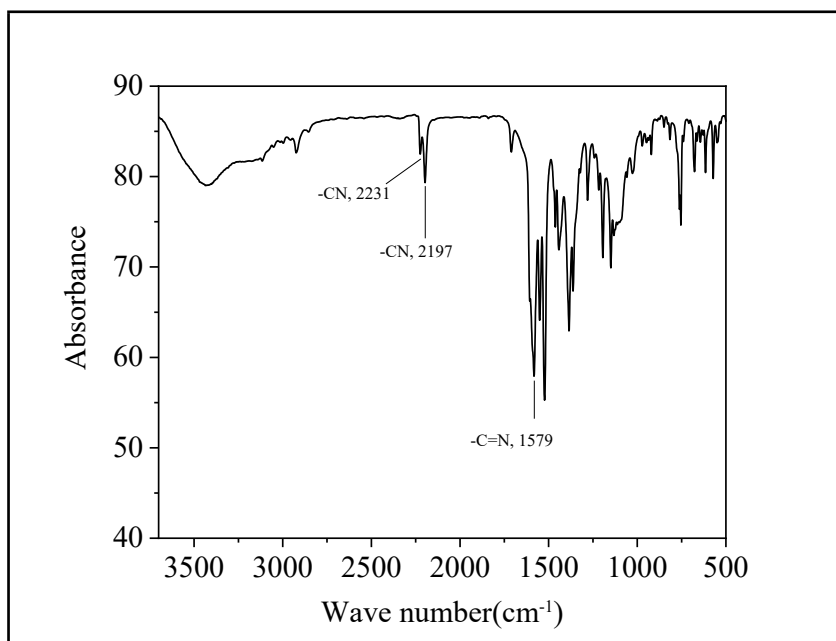

**Fig. S22:** FTIR spectrum of  $Co-1^H$ .



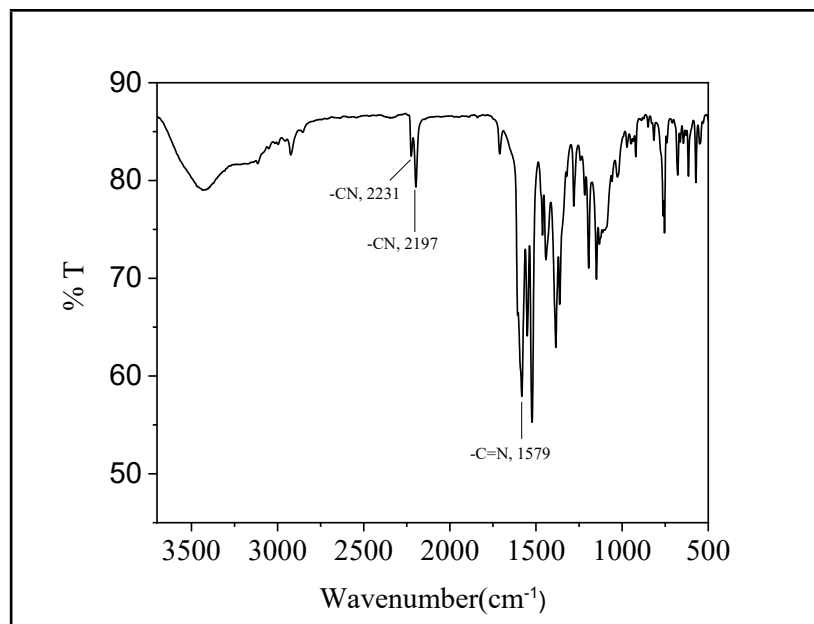

**Fig. S23:** FTIR spectrum of Co-1<sup>Br</sup>.

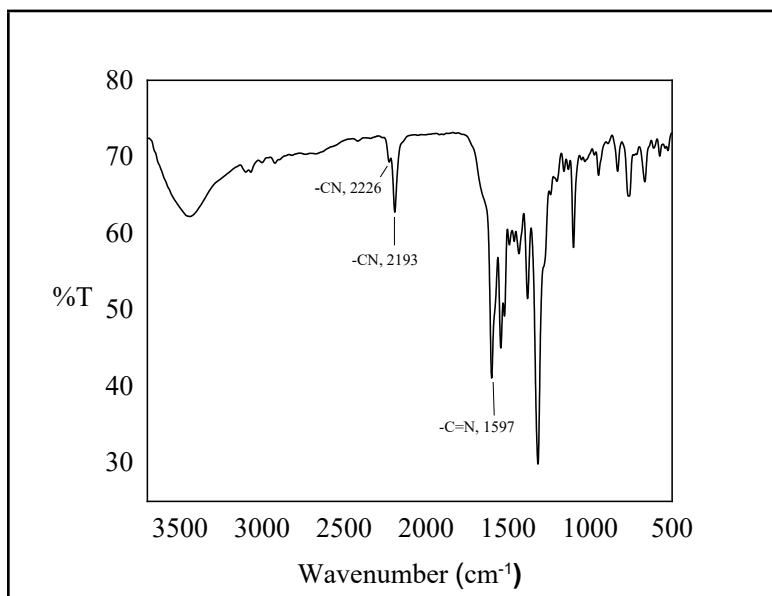

**Fig. S24:** FTIR spectrum of Co-1<sup>NO2</sup>.

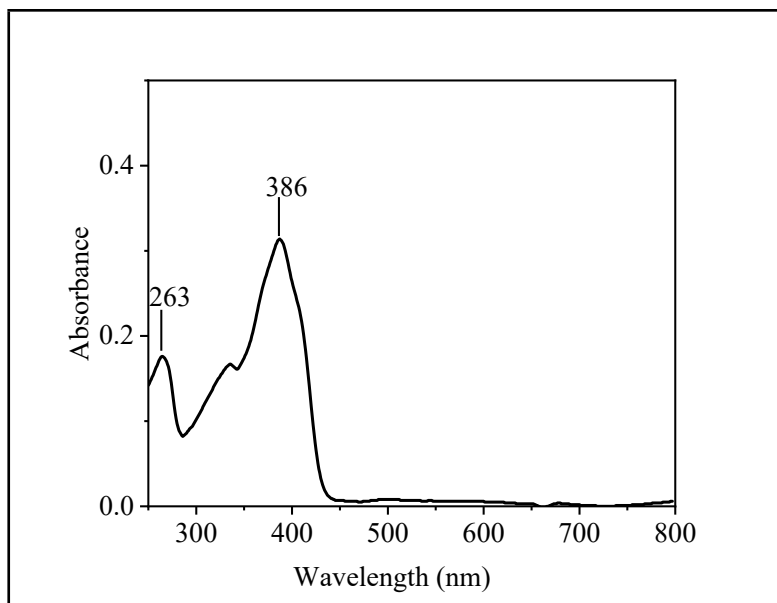

**Fig. S25:** Electronic absorption spectra of  $\text{H}_2\text{L}^{\text{H}}$  ( $0.5 \times 10^{-4} \text{ M}$ ) in DMF).

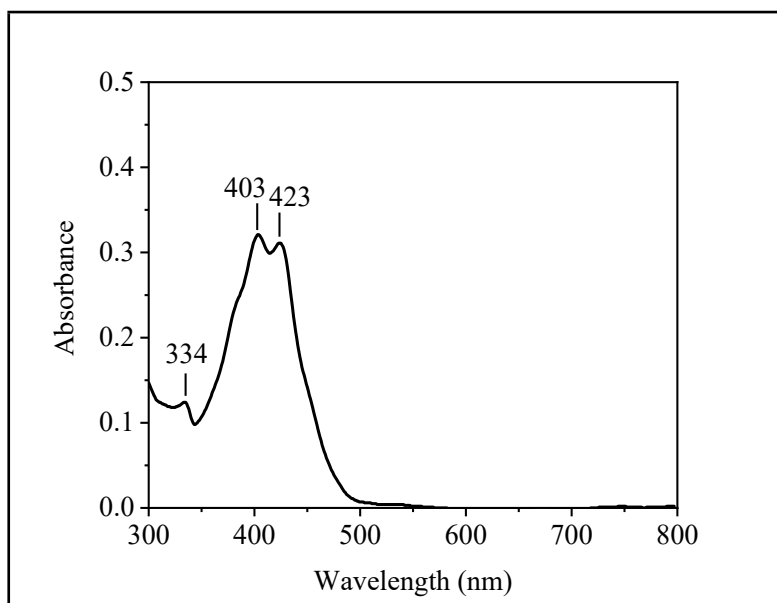

**Fig. S26:** Electronic absorption spectra of  $\text{H}_2\text{L}^{\text{Br}}$  ( $1 \times 10^{-5} \text{ M}$ ) in DMF).

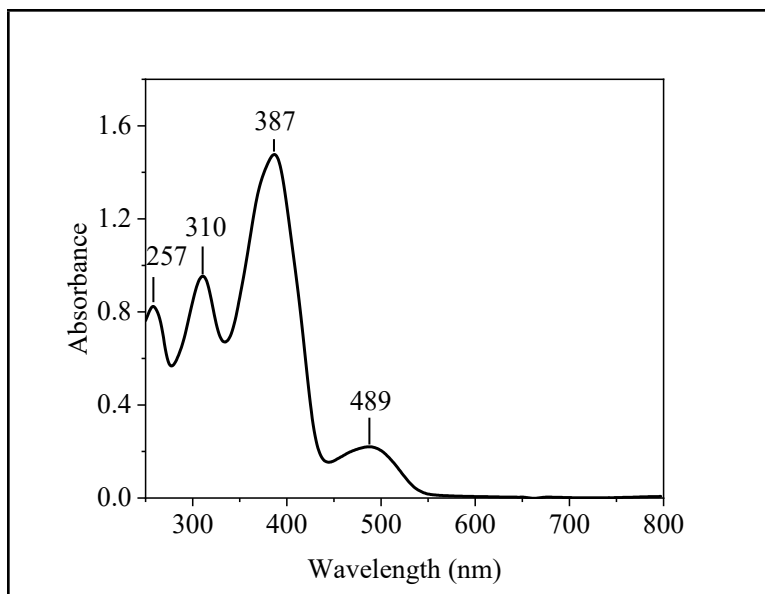

**Fig. S27:** Electronic absorption spectra of  $\text{H}_2\text{L}^{\text{NO}_2}$  ( $0.5 \times 10^{-4}(\text{M})$  in  $\text{CH}_3\text{CN}$ ).

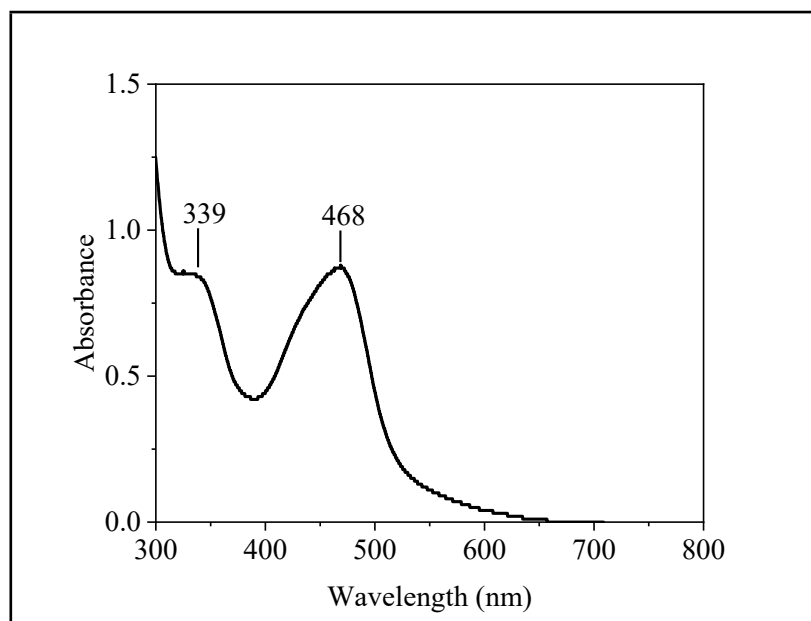

**Fig. S28:** Electronic absorption spectra of  $\text{Co-1}^{\text{H}}$  ( $0.5 \times 10^{-4}(\text{M})$  in  $\text{CH}_3\text{CN}$ ).

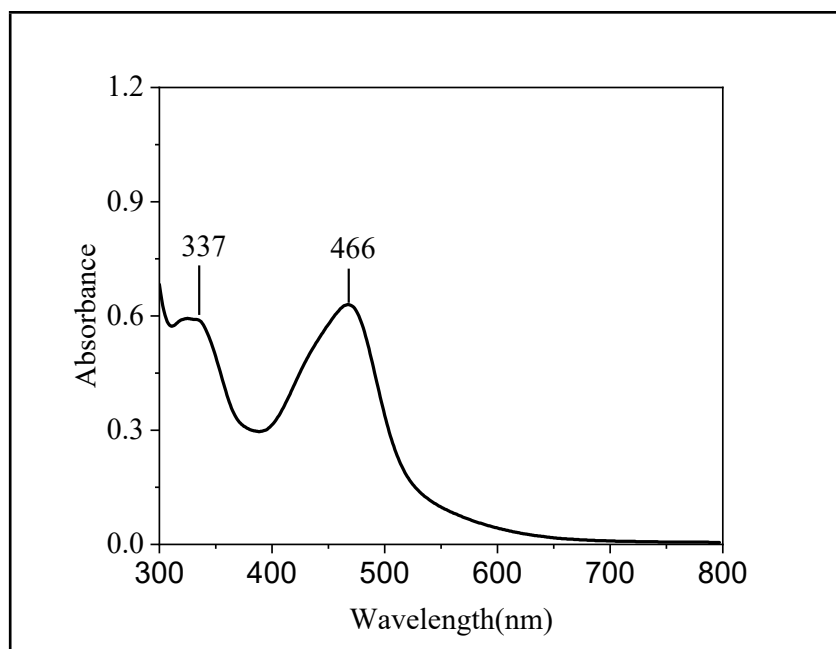

**Fig. S29:** Electronic absorption spectra of **Co-1<sup>Br</sup>**( $0.5 \times 10^{-4}$ (M) in CH<sub>3</sub>CN).

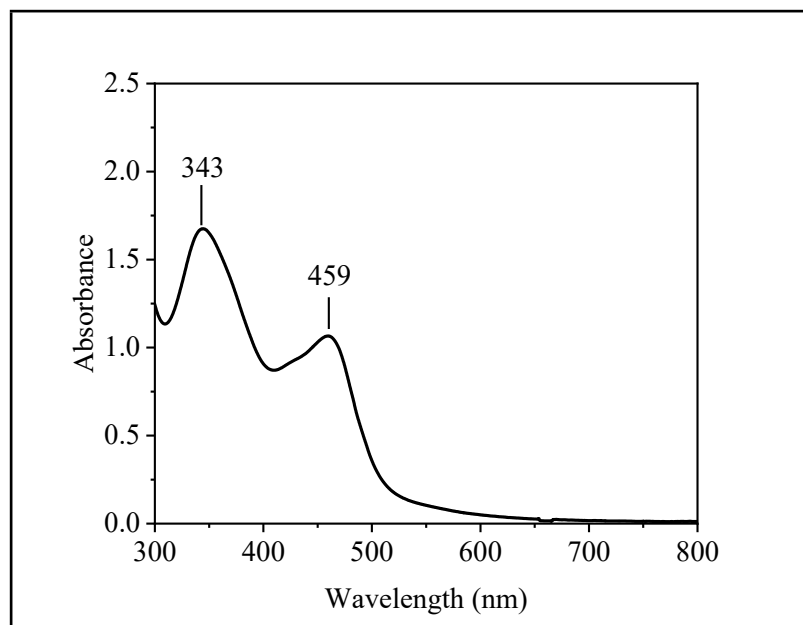

**Fig. S30:** Electronic absorption spectra of **Co-1<sup>NO2</sup>**( $0.5 \times 10^{-4}$ (M) in CH<sub>3</sub>CN).

**Hirshfeld Surface Analysis:**

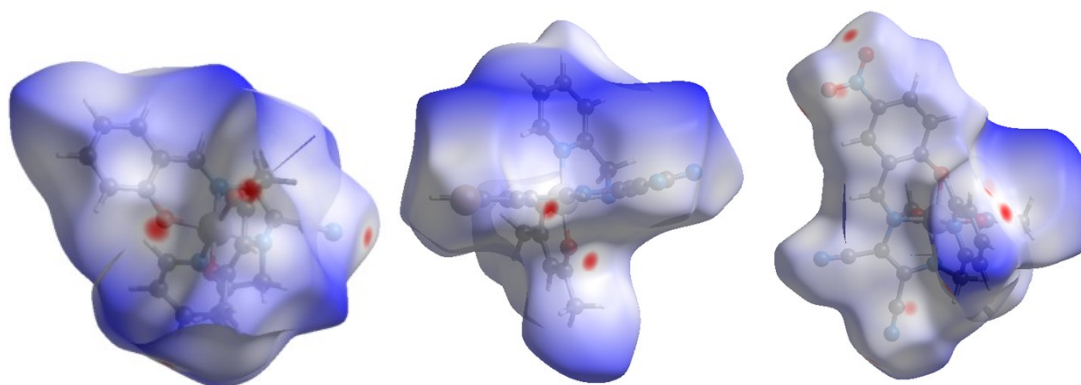

**Fig. S31:** The  $d_{\text{norm}}$  of 3D Hirshfeld surfaces of the complex Co-1<sup>H</sup>(left), Co-1<sup>Br</sup>(middle) and Co-1<sup>NO2</sup>(right).

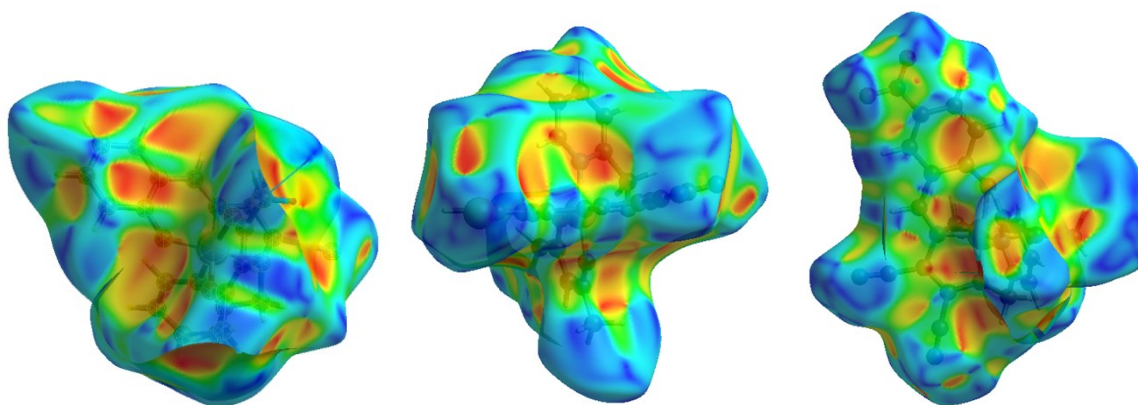

**Fig. S32:** The shape index of 3D Hirshfeld surfaces of the complex Co-1<sup>H</sup>(left), Co-1<sup>Br</sup>(middle) and Co-1<sup>NO2</sup>(right).

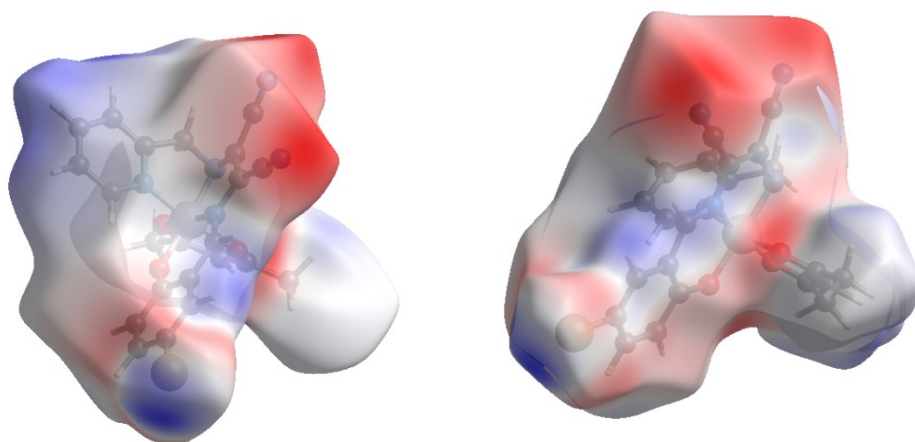

**Fig. S33:** Two views of three dimensional HS plotted over electrostatic potential for **Co-1<sup>Br</sup>**.

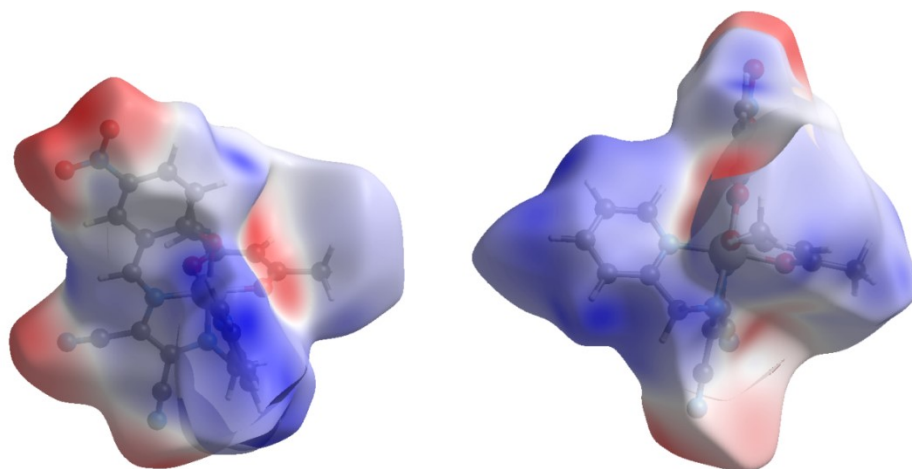

**Fig. S34:** Two views of three dimensional HS plotted over electrostatic potential for **Co-1<sup>NO2</sup>**.

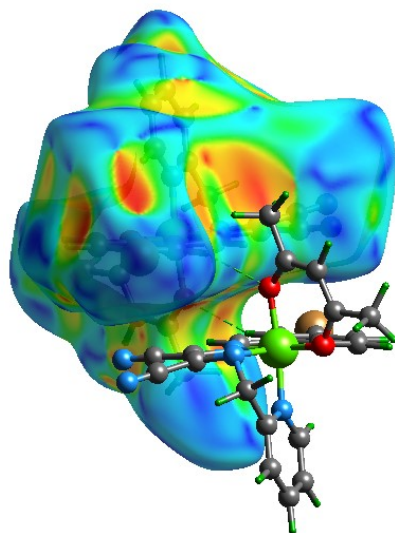

**Fig. S35:** Three dimensional HS plotted shape index along with representative interacting molecules in surface for **Co-1<sup>Br</sup>**.

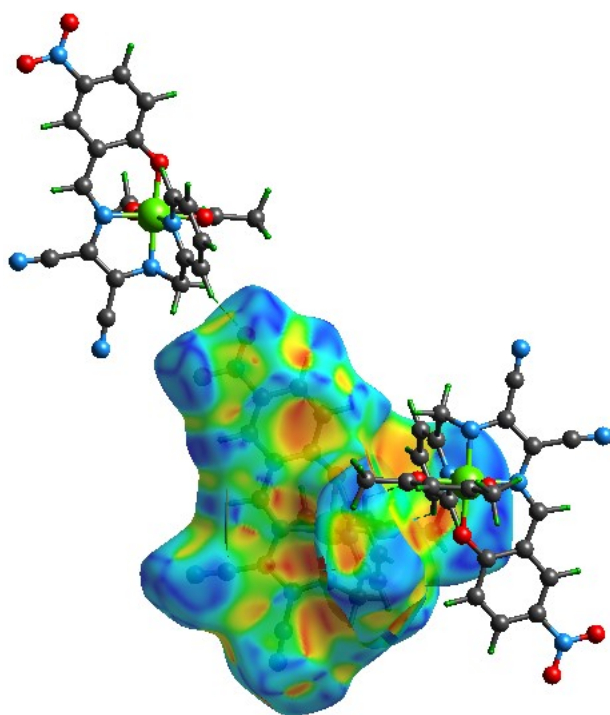

**Fig. S36:** Three dimensional HS plotted shape index along with representative interacting molecules in surface for **Co-1<sup>NO2</sup>**.

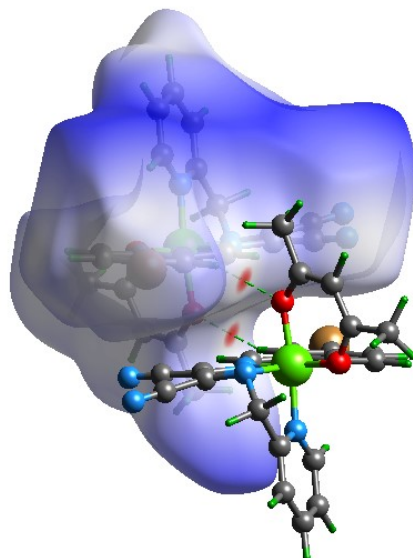

**Fig. S37:** Three dimensional HS plotted over  $d_{\text{norm}}$  along with representative interacting molecules in surface for **Co-1<sup>Br</sup>**.

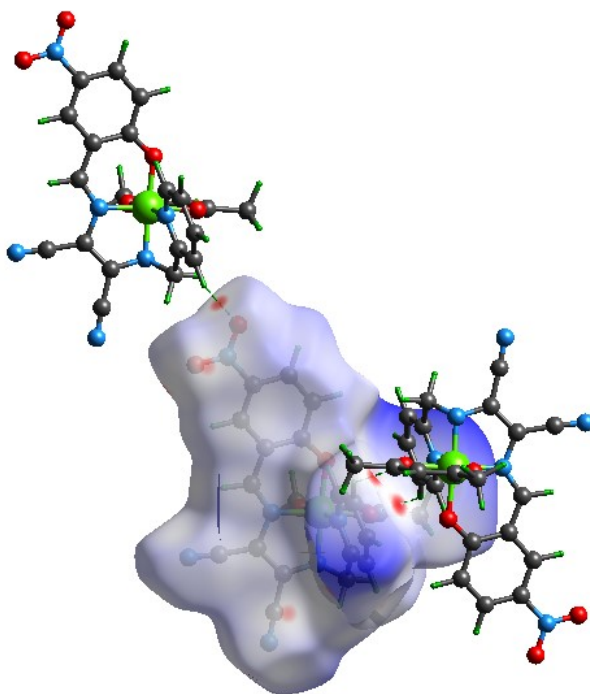

**Fig. S38:** Three dimensional HS plotted over  $d_{\text{norm}}$  along with representative interacting molecules in surface for **Co-1<sup>NO2</sup>**.



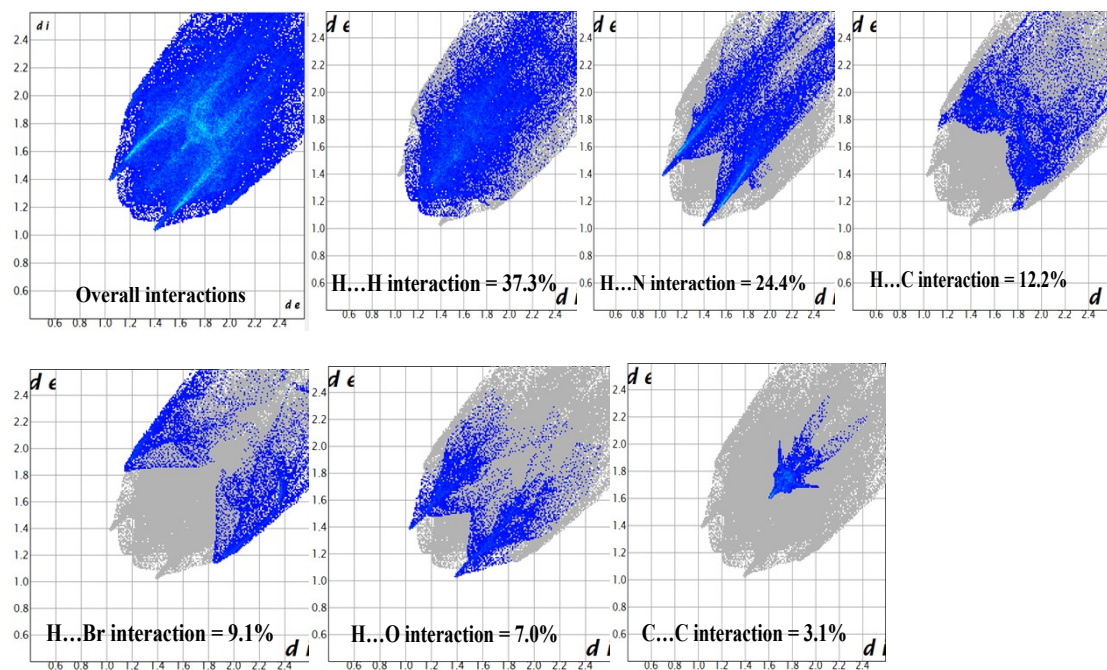

**Fig. S39:** 2D Fingerprint plots as obtained from the crystal structures for different type of interactions (a) Overall, (b) H..H, (c) H..N, (d) H..C, (e) H..Br, (f) H..O and (g) C..C present in the complex, **Co-1<sup>Br</sup>**. The term ‘ $d_i$ ’ stands for distance from the HS to the nearest atom inside the HS, whereas  $d_e$  stands for the same from to the nearest atom outside the HS.

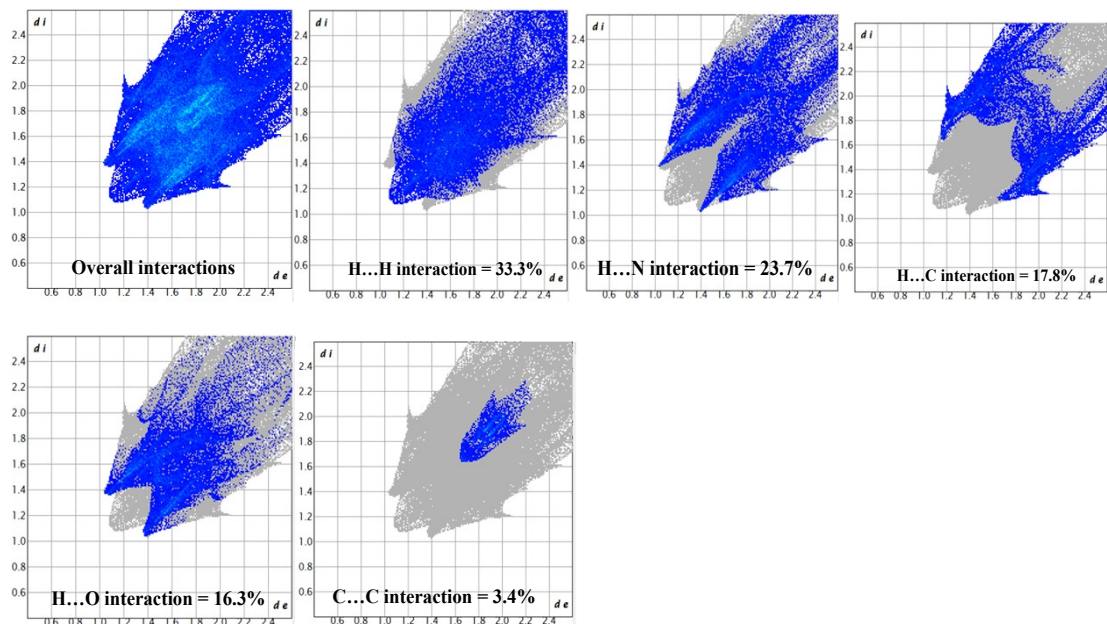

**Fig. S40:** 2D Fingerprint plots as obtained from the crystal structures for different type of interactions (a) Overall, (b) H..H, (c) H..N, (d) H..C, (e) H..O, and (f) C..C present in the complex, **Co-1<sup>NO2</sup>**. The term 'd<sub>i</sub>' stands for distance from the HS to the nearest atom inside the HS, whereas d<sub>e</sub> stands for the same from to the nearest atom outside the HS.

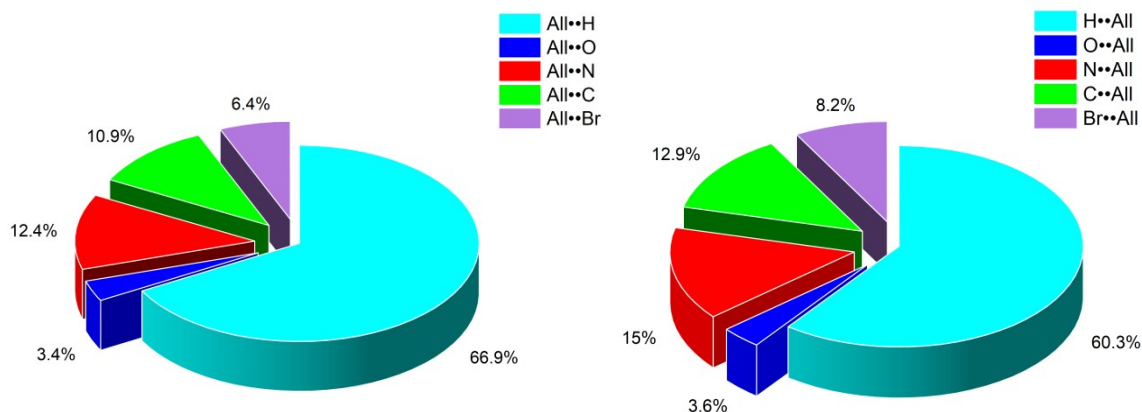

**Fig. S41:** Left: Percentage contributions of the interaction of all the atoms present inside the HS to an atom outside the HS. Right: Percentage contributions of the interaction of an atom present inside the HS to all the atoms present in the surrounding of the HS for complex **Co-1<sup>Br</sup>**.

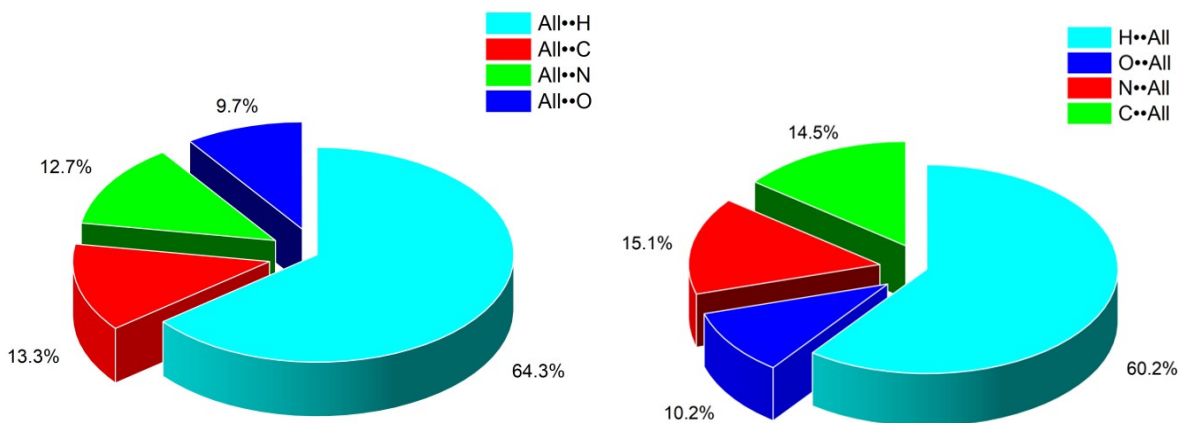

**Fig. S42:** Left: Percentage contributions of the interaction of all the atoms present inside the HS to an atom outside the HS. Right: Percentage contributions of the interaction of an atom present inside the HS to all the atoms present in the surrounding of the HS for complex **Co-1<sup>NO2</sup>**.

Interaction Energies (kJ/mol)  
 R is the distance between molecular centroids (mean atomic position) in Å.

Total energies, only reported for two benchmarked energy models, are the sum of the four energy components, scaled appropriately (see the scale factor table below)

|  | N | Symop      | R     | Electron Density | E_ele | E_pol | E_dis | E_rep | E_tot |
|--|---|------------|-------|------------------|-------|-------|-------|-------|-------|
|  | 2 | x, y, z    | 8.87  | B3LYP/6-31G(d,p) | -13.9 | -4.9  | -32.5 | 21.4  | -33.4 |
|  | 2 | x, y, z    | 10.51 | B3LYP/6-31G(d,p) | 0.3   | -1.1  | -21.1 | 11.5  | -11.8 |
|  | 2 | x, y, z    | 10.28 | B3LYP/6-31G(d,p) | -13.4 | -2.9  | -8.6  | 10.2  | -17.5 |
|  | 1 | -x, -y, -z | 7.61  | B3LYP/6-31G(d,p) | -7.4  | -6.6  | -52.9 | 27.9  | -41.6 |
|  | 1 | -x, -y, -z | 8.67  | B3LYP/6-31G(d,p) | -39.6 | -13.5 | -49.7 | 41.0  | -69.8 |
|  | 1 | -x, -y, -z | 7.98  | B3LYP/6-31G(d,p) | -25.8 | -6.8  | -60.6 | 44.4  | -57.7 |
|  | 1 | -x, -y, -z | 10.62 | B3LYP/6-31G(d,p) | -9.6  | -4.3  | -8.3  | 3.1   | -18.7 |
|  | 1 | -x, -y, -z | 12.56 | B3LYP/6-31G(d,p) | 5.6   | -1.4  | -4.8  | 0.0   | 0.7   |
|  | 1 | -x, -y, -z | 12.31 | B3LYP/6-31G(d,p) | 1.1   | -0.3  | -5.4  | 0.0   | -3.8  |
|  | 1 | -x, -y, -z | 11.45 | B3LYP/6-31G(d,p) | -1.6  | -0.3  | -4.1  | 0.1   | -5.4  |

Scale factors for benchmarked energy models  
 See Mackenzie et al. IUCrJ (2017)

| Energy Model                                     | k_ele | k_pol | k_disp | k_rep |
|--------------------------------------------------|-------|-------|--------|-------|
| CE-HF ... HF/3-21G electron densities            | 1.019 | 0.651 | 0.901  | 0.811 |
| CE-B3LYP ... B3LYP/6-31G(d,p) electron densities | 1.057 | 0.740 | 0.871  | 0.618 |

Fig. S43. Interaction energies for the complex Co-1<sup>H</sup>.

Interaction Energies (kJ/mol)  
 R is the distance between molecular centroids (mean atomic position) in Å.

Total energies, only reported for two benchmarked energy models, are the sum of the four energy components, scaled appropriately (see the scale factor table below)

|  | N | Symop      | R     | Electron Density | E_ele | E_pol | E_dis | E_rep | E_tot |
|--|---|------------|-------|------------------|-------|-------|-------|-------|-------|
|  | 2 | x, y, z    | 12.26 | B3LYP/6-31G(d,p) | -13.0 | -1.2  | -19.6 | 0.0   | -31.7 |
|  | 2 | x, y, z    | 11.37 | B3LYP/6-31G(d,p) | -2.7  | -2.2  | -8.7  | 5.8   | -8.5  |
|  | 1 | -x, -y, -z | 11.39 | B3LYP/6-31G(d,p) | -2.4  | -0.4  | -9.3  | 1.7   | -9.9  |
|  | 1 | -x, -y, -z | 8.82  | B3LYP/6-31G(d,p) | -14.0 | -3.7  | -49.1 | 26.0  | -44.3 |
|  | 2 | x, y, z    | 12.11 | B3LYP/6-31G(d,p) | -3.5  | -2.1  | -5.6  | 0.0   | -10.2 |
|  | 1 | -x, -y, -z | 10.76 | B3LYP/6-31G(d,p) | -13.0 | -3.6  | -18.7 | 10.3  | -26.3 |
|  | 2 | x, y, z    | 11.48 | B3LYP/6-31G(d,p) | 3.4   | -1.4  | -9.6  | 5.4   | -2.5  |
|  | 1 | -x, -y, -z | 8.85  | B3LYP/6-31G(d,p) | -23.9 | -8.8  | -65.6 | 54.1  | -55.4 |
|  | 1 | -x, -y, -z | 5.89  | B3LYP/6-31G(d,p) | -27.3 | -5.5  | -99.5 | 80.5  | -69.8 |
|  | 1 | -x, -y, -z | 12.55 | B3LYP/6-31G(d,p) | -29.1 | -6.6  | -12.1 | 0.0   | -46.2 |

Scale factors for benchmarked energy models  
 See Mackenzie et al. IUCrJ (2017)

| Energy Model                                     | k_ele | k_pol | k_disp | k_rep |
|--------------------------------------------------|-------|-------|--------|-------|
| CE-HF ... HF/3-21G electron densities            | 1.019 | 0.651 | 0.901  | 0.811 |
| CE-B3LYP ... B3LYP/6-31G(d,p) electron densities | 1.057 | 0.740 | 0.871  | 0.618 |

Fig. S44. Interaction energies for the complex Co-1<sup>Br</sup>.

Interaction Energies (kJ/mol)  
R is the distance between molecular centroids (mean atomic position) in Å.

Total energies, only reported for two benchmarked energy models, are the sum of the four energy components, scaled appropriately (see the scale factor table below)

|  | N | Symp       | R     | Electron Density | E_ele | E_pol | E_dis  | E_rep | E_tot  |
|--|---|------------|-------|------------------|-------|-------|--------|-------|--------|
|  | 1 | -x, -y, -z | 5.88  | B3LYP/6-31G(d,p) | -39.3 | -17.8 | -113.5 | 79.9  | -104.3 |
|  | 1 | -x, -y, -z | 16.12 | B3LYP/6-31G(d,p) | 10.1  | -1.0  | -1.8   | 0.0   | 8.3    |
|  | 2 | x, y, z    | 12.92 | B3LYP/6-31G(d,p) | -5.2  | -5.2  | -13.2  | 0.0   | -20.8  |
|  | 1 | x, y, z    | 11.90 | B3LYP/6-31G(d,p) | 1.0   | -2.9  | -9.8   | 12.3  | -2.0   |
|  | 1 | -x, -y, -z | 11.96 | B3LYP/6-31G(d,p) | -21.8 | -4.4  | -9.7   | 6.0   | -31.0  |
|  | 0 | -x, -y, -z | 9.32  | B3LYP/6-31G(d,p) | -13.5 | -2.2  | -26.2  | 19.5  | -26.6  |
|  | 0 | -x, -y, -z | 9.82  | B3LYP/6-31G(d,p) | -10.5 | -2.3  | -14.0  | 7.4   | -20.4  |
|  | 0 | -x, -y, -z | 9.33  | B3LYP/6-31G(d,p) | -10.7 | -4.5  | -59.3  | 39.6  | -41.8  |
|  | 1 | -x, -y, -z | 12.48 | B3LYP/6-31G(d,p) | -8.5  | -1.9  | -7.8   | 0.0   | -17.2  |
|  | 1 | x, y, z    | 10.28 | B3LYP/6-31G(d,p) | -6.5  | -1.9  | -8.4   | 2.2   | -14.2  |
|  | 1 | -x, -y, -z | 7.84  | B3LYP/6-31G(d,p) | -25.1 | -11.4 | -71.8  | 66.6  | -56.4  |

Scale factors for benchmarked energy models  
See Mackenzie et al. IUCrJ (2017)

| Energy Model                                     | k_ele | k_pol | k_disp | k_rep |
|--------------------------------------------------|-------|-------|--------|-------|
| CE+HF ... HF/3-21G electron densities            | 1.019 | 0.651 | 0.901  | 0.811 |
| CE-B3LYP ... B3LYP/6-31G(d,p) electron densities | 1.057 | 0.740 | 0.871  | 0.618 |

Fig. S45. Interaction energies for the complex **Co-1**<sup>NO2</sup>.

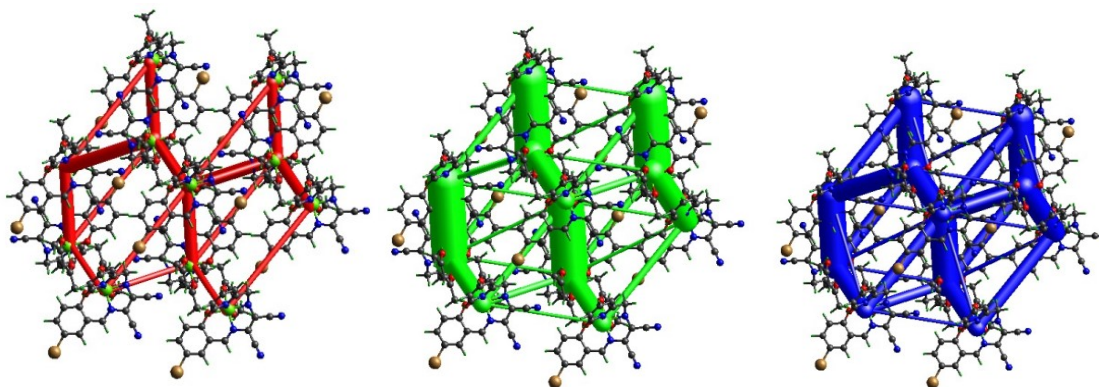

Fig. S46: Energy framework diagram for **Co-1**<sup>Br</sup> (Left: Coulomb Energy, Middle: Dispersion Energy, Right: Total Energy) for **Co-1**<sup>Br</sup>. Scale factor of 50 kJ mol<sup>-1</sup> with a cut-off value of 5 kJ mol<sup>-1</sup>.

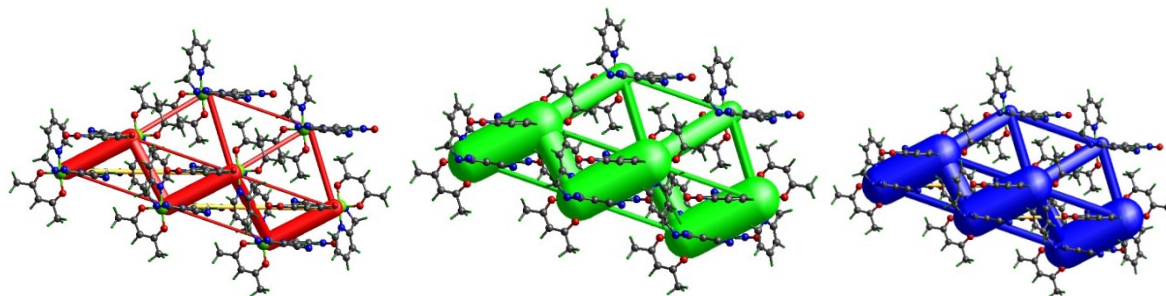

**Fig. S47:**Energy framework diagram for **Co-1**<sup>NO<sub>2</sub></sup> (Left: Coulomb Energy, Middle: Dispersion Energy, Right: Total Energy) for **Co-1**<sup>NO<sub>2</sub></sup>. Scale factor of 50 kJ mol<sup>-1</sup> with a cut-off value of 5 kJ mol<sup>-1</sup>.

### Catalytic Study:

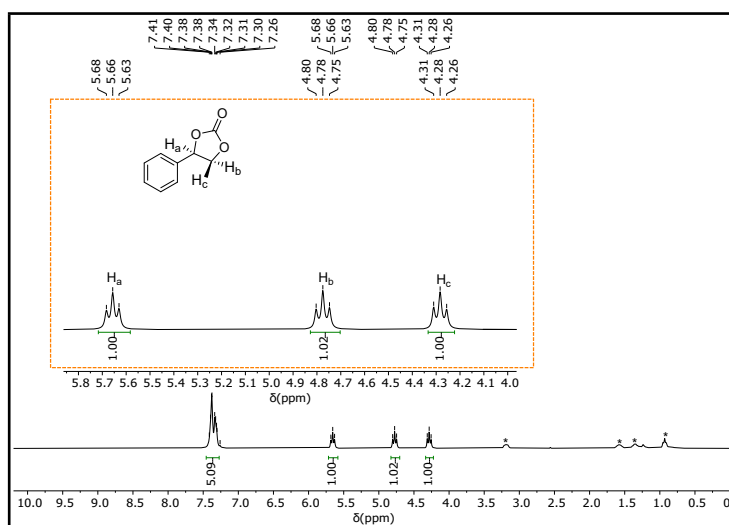

**Fig. S48:**<sup>1</sup>H NMR Spectrum in CDCl<sub>3</sub> obtained for a reaction mixture taken after 22 hrs (**Co-1**<sup>H</sup>: 1.5 mol%, TBAB: 5 mol%) showing three peaks of styrene carbonate (>99% conversion) [\* indicates Tetrabutyl ammonium bromide (TBAB) peaks].

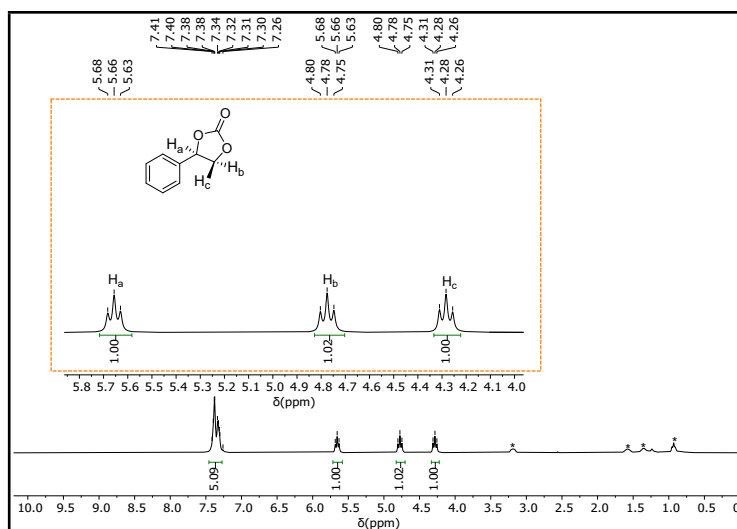

**Fig. S49:**  $^1\text{H}$  NMR Spectrum in  $\text{CDCl}_3$  obtained for a reaction mixture taken after 22 hrs (**Co-1<sup>Br</sup>**: 1.5 mol%, TBAB: 5 mol%) showing three peaks of styrene carbonate (>99% conversion) [\* indicates Tetrabutyl ammonium bromide (TBAB) peaks].

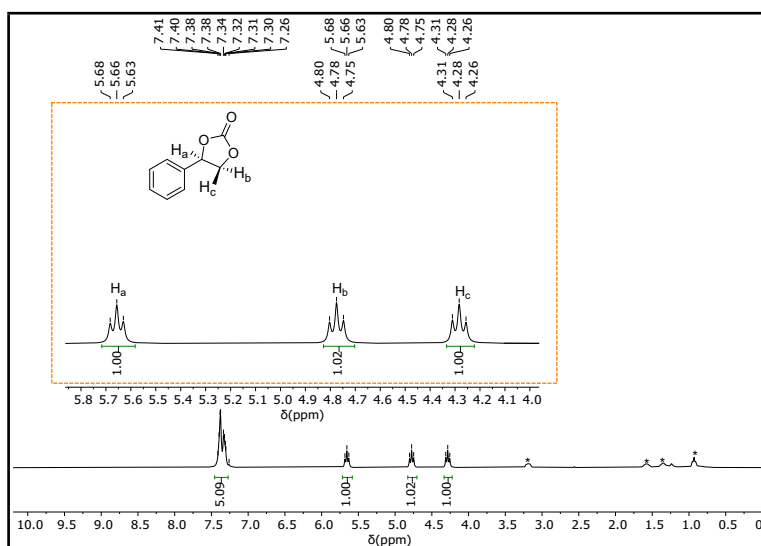

**Fig. S50:**  $^1\text{H}$  NMR Spectrum in  $\text{CDCl}_3$  obtained for a reaction mixture taken after 22 hrs (**Co-1<sup>NO2</sup>**: 1.5 mol%, TBAB: 5 mol%) showing three peaks of styrene carbonate (>99% conversion) [\* indicates Tetrabutyl ammonium bromide (TBAB) peaks].

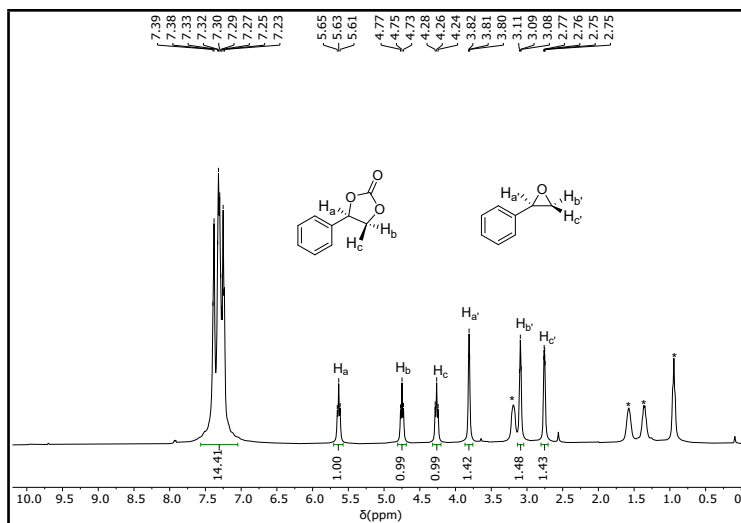

**Fig. S51:**  $^1\text{H}$  NMR Spectrum in  $\text{CDCl}_3$  obtained for a reaction mixture taken after 8 hrs (**Co-1<sup>H</sup>**: 1.5 mol%, TBAB: 5 mol%) showing three peaks of styrene carbonate and three peaks associated to styrene oxide starting material (41% conversion) [\* indicates Tetrabutyl ammonium bromide (TBAB) peaks].

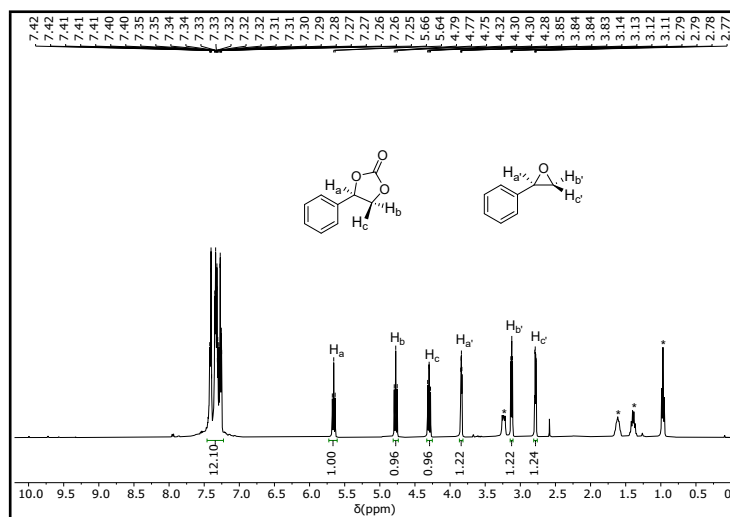

**Fig. S52:**  $^1\text{H}$  NMR Spectrum in  $\text{CDCl}_3$  obtained for a reaction mixture taken after 8 hrs (**Co-1<sup>Br</sup>**: 1.5 mol%, TBAB: 5 mol%) showing three peaks of styrene carbonate and three peaks associated to styrene oxide starting material (45% conversion) [\* indicates Tetrabutyl ammonium bromide (TBAB) peaks].

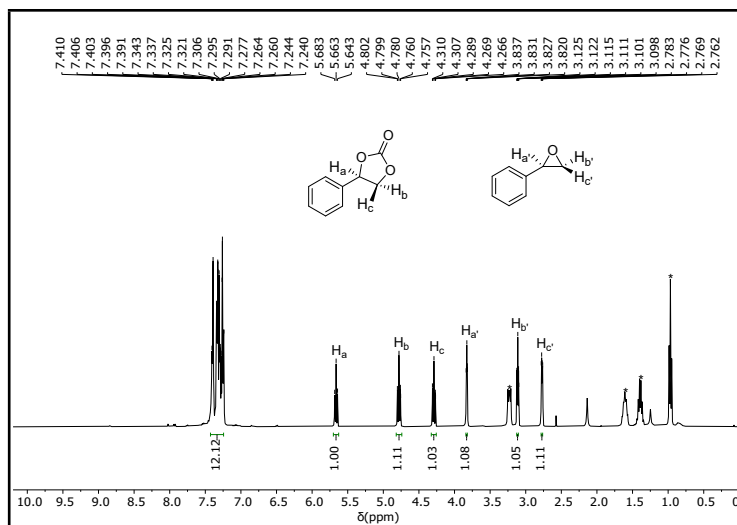

**Fig. S53:**  $^1\text{H}$  NMR Spectrum in  $\text{CDCl}_3$  obtained for a reaction mixture taken after 8 hrs (**Co-1** $^{\text{NO}_2}$ : 1.5 mol%, TBAB: 5 mol%) showing three peaks of styrene carbonate and three peaks associated to styrene oxide starting material (48% conversion) [\* indicates Tetrabutyl ammonium bromide (TBAB) peaks].

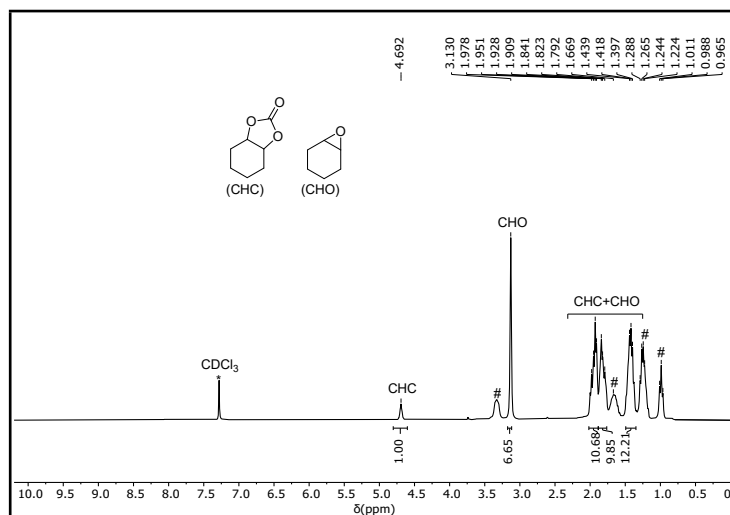

**Fig. S54:**  $^1\text{H}$  NMR Spectrum in  $\text{CDCl}_3$  obtained for a reaction mixture taken after 22 hrs (**Co-1** $^{\text{H}}$ : 1.5 mol%, TBAB: 5 mol%) showing peaks of cyclohexane carbonate (13% conversion) at room temperature. [# indicates Tetrabutyl ammonium bromide (TBAB) peaks].



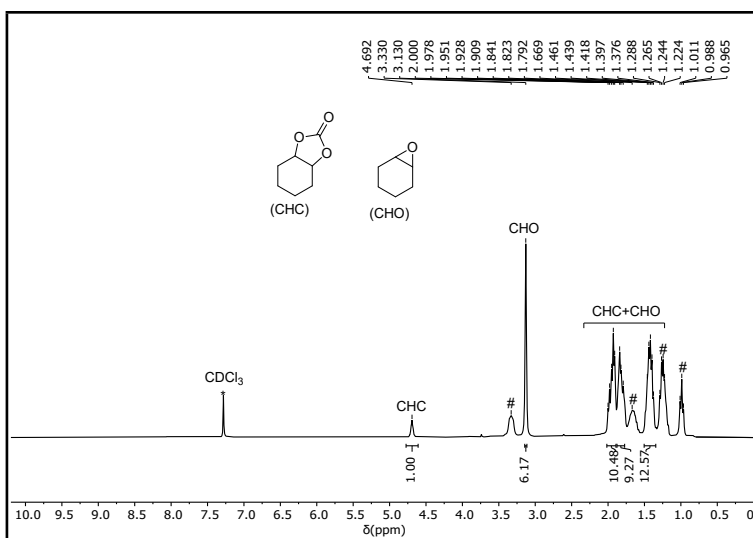

**Fig. S55:**  $^1\text{H}$  NMR Spectrum in  $\text{CDCl}_3$  obtained for a reaction mixture taken after 22 hrs (**Co-1<sup>Br</sup>**: 1.5 mol%, TBAB: 5 mol%) showing peaks of cyclohexane carbonate (15% conversion) at room temperature. [# indicates Tetrabutyl ammonium bromide (TBAB) peaks].

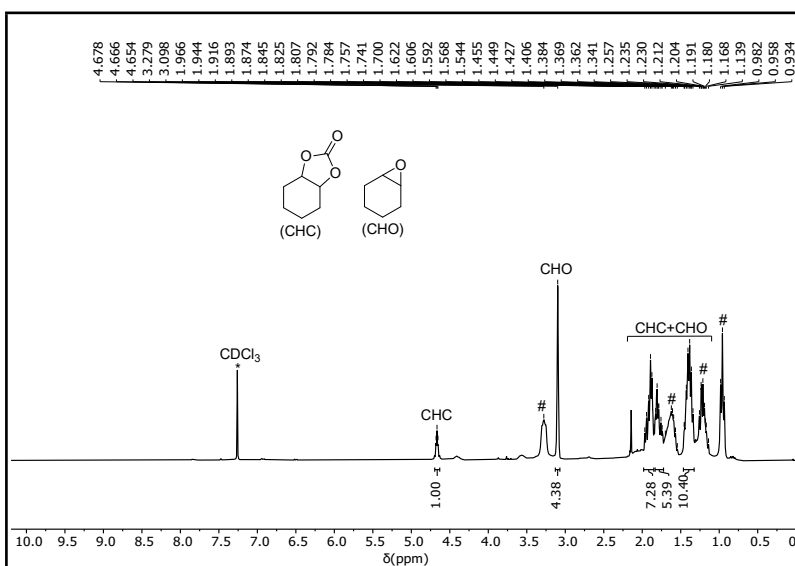

**Fig. S56:**  $^1\text{H}$  NMR Spectrum in  $\text{CDCl}_3$  obtained for a reaction mixture taken after 22 hrs (**Co-1<sup>NO2</sup>**: 1.5 mol%, TBAB: 5 mol%) showing peaks of cyclohexane carbonate (18% conversion) at room temperature. [# indicates Tetrabutyl ammonium bromide (TBAB) peaks].

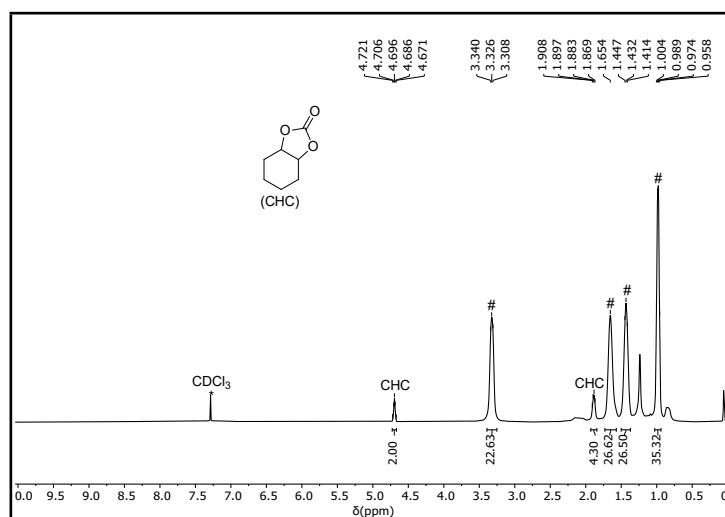

**Fig. S57:**  $^1\text{H}$  NMR Spectrum in  $\text{CDCl}_3$  obtained for a reaction mixture taken after 22 hrs (**Co-1<sup>H</sup>**: 1.5 mol%, TBAB: 5 mol%) showing peaks of cyclohexane carbonate (>99 % conversion) at  $70^\circ\text{C}$ . [# indicates Tetrabutyl ammonium bromide (TBAB) peaks].

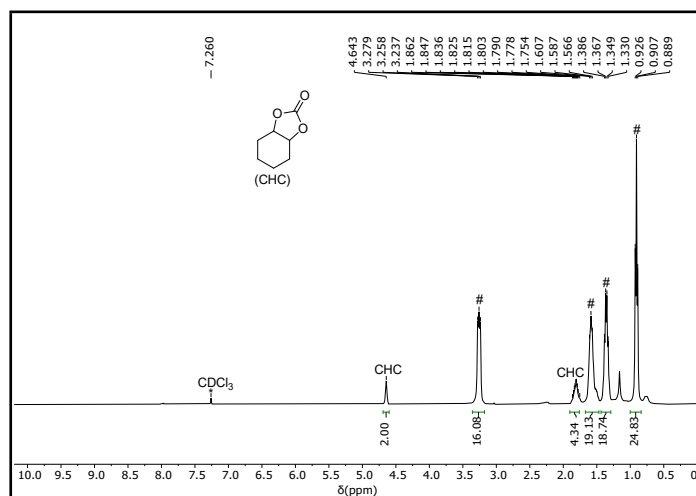

**Fig. S58:**  $^1\text{H}$  NMR Spectrum in  $\text{CDCl}_3$  obtained for a reaction mixture taken after 22 hrs (**Co-1<sup>Br</sup>**: 1.5 mol%, TBAB: 5 mol%) showing peaks of cyclohexane carbonate (>99 % conversion) at  $70^\circ\text{C}$ . [# indicates Tetrabutyl ammonium bromide (TBAB) peaks].

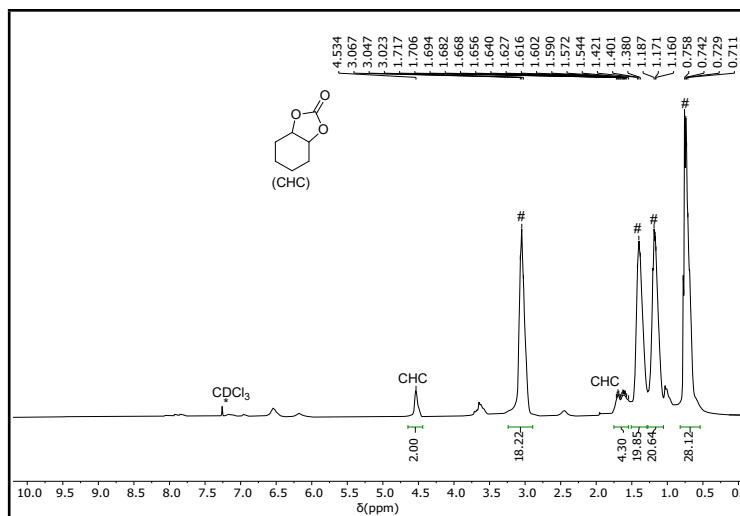

**Fig. S59:**  $^1\text{H}$  NMR Spectrum in  $\text{CDCl}_3$  obtained for a reaction mixture taken after 22 hrs (**Co-1 $^{\text{NO}_2}$** : 1.5 mol%, TBAB: 5 mol%) showing peaks of cyclohexane carbonate (>99 % conversion) at  $70^\circ\text{C}$ . [# indicates Tetrabutyl ammonium bromide (TBAB) peaks].

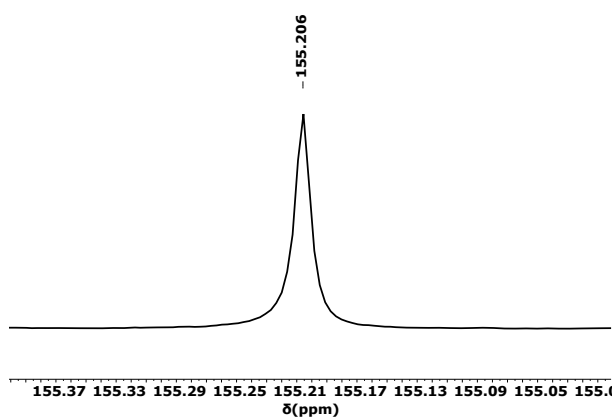

**Fig. S60:** Carbonyl region of  $^{13}\text{C}$  NMR spectrum of cyclohexane carbonate synthesized using **Co-1 $^{\text{H}}$** .

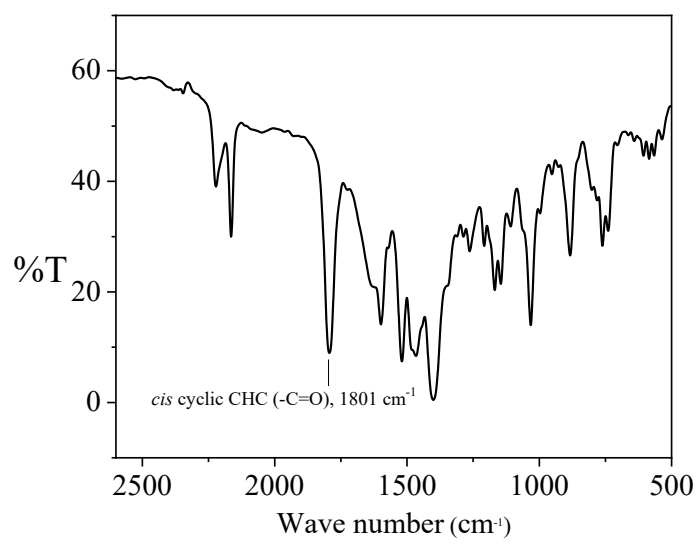

**Fig. S61:** FT-IR spectrum of cyclic cyclohexane carbonate (*cis*) synthesized using **Co-1<sup>H</sup>** .

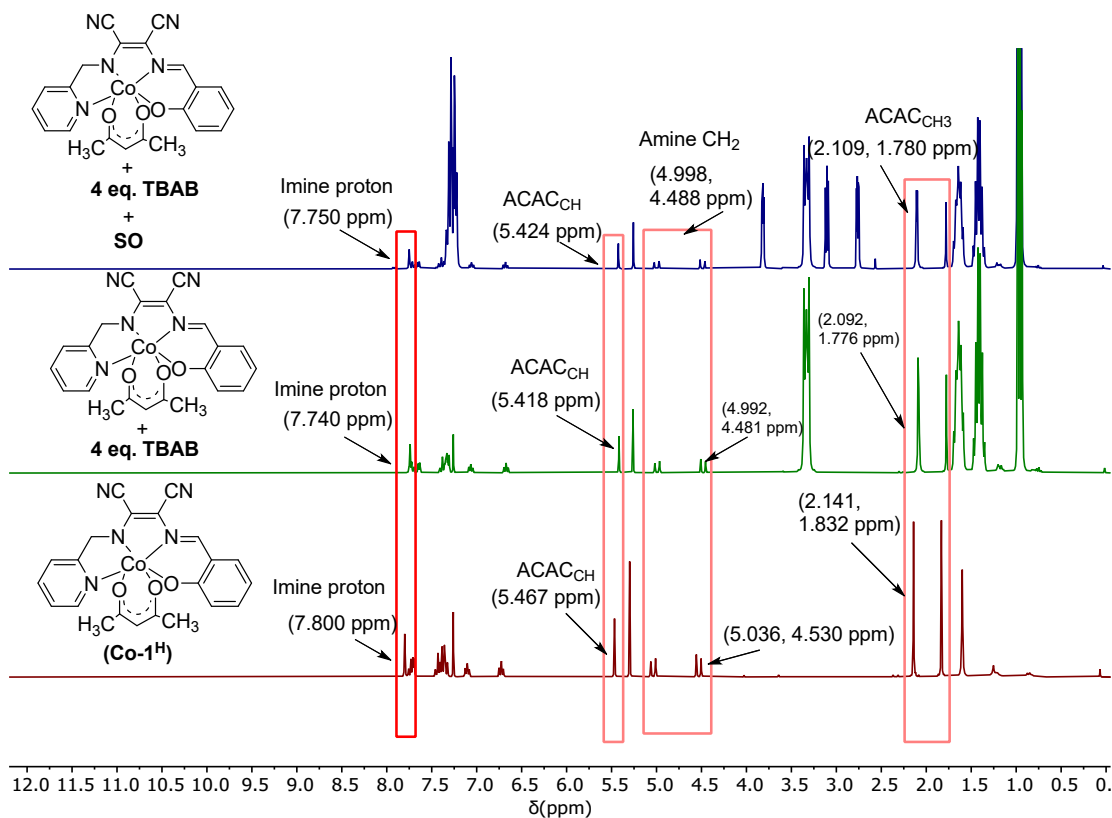

**Fig. S62:** Comparison between the  $^1\text{H}$  NMR spectra of complex  $\text{Co-1}^{\text{H}}$  (bottom),  $\text{Co-1}^{\text{H}}$  in the presence of 4 equiv. TBAB (Middle) and  $\text{Co-1}^{\text{H}}$  in the presence of 4 equiv. TBAB and 10 eq. SO (Top) in  $\text{CDCl}_3$  ( $\delta_{\text{H}} 7.26$  ppm).

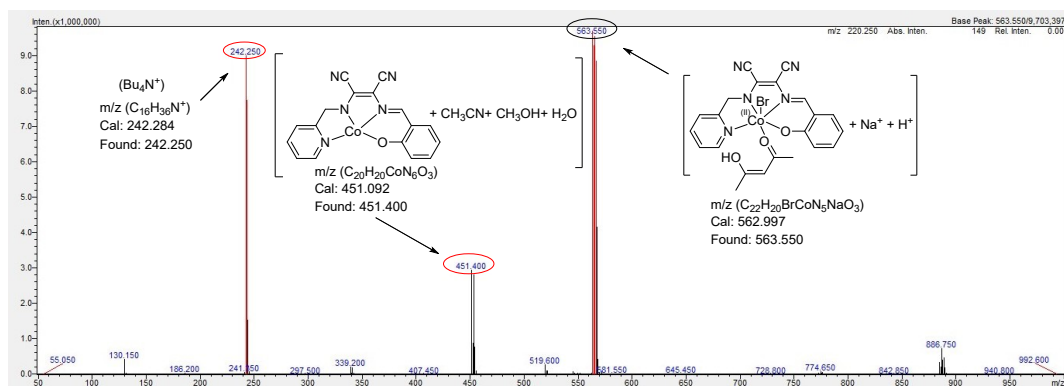

**Fig. S63:** ESI-MS spectrum of the reaction mixture of  $[\text{Co}(\text{L}^{\text{H}})(\text{acac})]$  with excess TBAB.

**Table S1: Crystallographic data parameters.**

| <b>Compound ID</b>                          | <b>Co-1<sup>H</sup></b>                                             | <b>Co-1<sup>Br</sup></b>                                            | <b>Co-1<sup>NO2</sup></b>                                                       |
|---------------------------------------------|---------------------------------------------------------------------|---------------------------------------------------------------------|---------------------------------------------------------------------------------|
| CCDC number                                 | 2314645                                                             | 2314644                                                             | 2314643                                                                         |
| Empirical formula                           | C <sub>22</sub> H <sub>18</sub> CoN <sub>5</sub> O <sub>3</sub>     | C <sub>22</sub> H <sub>17</sub> BrCoN <sub>5</sub> O <sub>3</sub>   | C <sub>23</sub> H <sub>19</sub> Cl <sub>2</sub> CoN <sub>6</sub> O <sub>5</sub> |
| Formula weight                              | 459.34                                                              | 538.24                                                              | 589.27                                                                          |
| Temperature/K                               | 100.0(2)                                                            | 100.0(2)                                                            | 100.0(2)                                                                        |
| Crystal system                              | triclinic                                                           | triclinic                                                           | triclinic                                                                       |
| Space group                                 | P-1                                                                 | P-1                                                                 | P-1                                                                             |
| a/Å                                         | 8.8732(16)                                                          | 11.372(3)                                                           | 10.2770(5)                                                                      |
| b/Å                                         | 10.2837(19)                                                         | 11.481(4)                                                           | 11.8990(6)                                                                      |
| c/Å                                         | 14.993(3)                                                           | 12.108(4)                                                           | 12.2515(6)                                                                      |
| α/°                                         | 78.404(4)                                                           | 76.880(5)                                                           | 63.338(2)                                                                       |
| β/°                                         | 79.175(4)                                                           | 62.834(4)                                                           | 81.714(2)                                                                       |
| γ/°                                         | 66.066(4)                                                           | 80.875(5)                                                           | 70.818(2)                                                                       |
| Volume/Å <sup>3</sup>                       | 1216.3(4)                                                           | 1367.1(7)                                                           | 1264.54(11)                                                                     |
| Z                                           | 2                                                                   | 2                                                                   | 2                                                                               |
| ρ <sub>calc</sub> /cm <sup>3</sup>          | 1.254                                                               | 1.308                                                               | 1.548                                                                           |
| μ/mm <sup>-1</sup>                          | 0.735                                                               | 2.117                                                               | 7.674                                                                           |
| F(000)                                      | 472.0                                                               | 540.0                                                               | 600.0                                                                           |
| Crystal size/mm <sup>3</sup>                | 0.09 × 0.08 × 0.08                                                  | 0.2 × 0.15 × 0.12                                                   | 0.12 × 0.1 × 0.09                                                               |
| Radiation                                   | MoKα (λ = 0.71073)                                                  | MoKα (λ = 0.71073)                                                  | CuKα (λ = 1.54178)                                                              |
| 2θ range for data collection/°              | 5.274 to 54.504                                                     | 3.65 to 50.674                                                      | 9.11 to 133.4                                                                   |
| Index ranges                                | -11 ≤ h ≤ 11,<br>-13 ≤ k ≤ 13,<br>-19 ≤ l ≤ 19                      | -13 ≤ h ≤ 13,<br>-13 ≤ k ≤ 13,<br>-14 ≤ l ≤ 14                      | -12 ≤ h ≤ 12,<br>-14 ≤ k ≤ 14,<br>-14 ≤ l ≤ 14                                  |
| Reflections collected                       | 29507                                                               | 28210                                                               | 21742                                                                           |
| Independent reflections                     | 5220<br>[R <sub>int</sub> = 0.0483,<br>R <sub>sigma</sub> = 0.0314] | 4970<br>[R <sub>int</sub> = 0.0663,<br>R <sub>sigma</sub> = 0.0502] | 4392<br>[R <sub>int</sub> = 0.0645,<br>R <sub>sigma</sub> = 0.0470]             |
| Data/restraints/parameters                  | 5220/0/282                                                          | 4970/0/291                                                          | 4392/0/309                                                                      |
| Goodness-of-fit on F <sup>2</sup>           | 1.073                                                               | 1.042                                                               | 1.064                                                                           |
| Final R indexes [I >= 2σ (I)]               | R <sub>1</sub> = 0.0411,<br>wR <sub>2</sub> = 0.1153                | R <sub>1</sub> = 0.0366,<br>wR <sub>2</sub> = 0.0832                | R <sub>1</sub> = 0.0456,<br>wR <sub>2</sub> = 0.1169                            |
| Final R indexes [all data]                  | R <sub>1</sub> = 0.0472,<br>wR <sub>2</sub> = 0.1217                | R <sub>1</sub> = 0.0603,<br>wR <sub>2</sub> = 0.0917                | R <sub>1</sub> = 0.0483,<br>wR <sub>2</sub> = 0.1184                            |
| Largest diff. peak/hole / e Å <sup>-3</sup> | 0.26/-0.81                                                          | 0.46/-0.47                                                          | 0.45/-0.52                                                                      |
